1 **Glycan-induced protein dynamics in human norovirus P dimers depend**  
2 **on virus strain and deamidation status**

3  
4 Jasmin Dülfer<sup>a</sup>, Hao Yan<sup>a</sup>, Maxim N Brodmerkel<sup>b</sup>, Robert Creutzmacher<sup>c</sup>, Alvaro  
5 Mallagaray<sup>c</sup>, Thomas Peters<sup>c</sup>, Carl Caleman<sup>d,e</sup>, Erik G Marklund<sup>b</sup>, Charlotte Uetrecht<sup>a,f</sup>

6  
7 a. Heinrich Pette Institute, Leibniz Institute for Experimental Virology, Hamburg,  
8 Germany

9 b. Department of Chemistry – BMC, Uppsala University, Uppsala, Sweden

10 c. Institute of Chemistry and Metabolomics, University of Lübeck, Lübeck, Germany

11 d. Department of Physics and Astronomy, Uppsala University, Uppsala, Sweden

12 e. Center for Free-Electron Laser Science, Deutsches Elektronen-Synchrotron,  
13 Hamburg, Germany

14 f. European XFEL GmbH, Schenefeld, Germany

15  
16 Correspondence: Charlotte Uetrecht, [charlotte.uetrecht@xfel.eu](mailto:charlotte.uetrecht@xfel.eu)

17  
18 Keywords: glycan interaction, norovirus capsid protein VP1, protruding domain, HDX-  
19 MS, native MS, hydrogen/deuterium exchange mass spectrometry

20  
21  
22 Running title: Glycan-induced protein dynamics in norovirus P dimers

23

## Glycan-induced protein dynamics in norovirus P dimers

### 24 Abbreviations

|    |           |                                                           |
|----|-----------|-----------------------------------------------------------|
| 25 | $A_{sas}$ | solvent accessible area                                   |
| 26 | CSP       | chemical shift perturbation                               |
| 27 | ESI       | electrospray ionization                                   |
| 28 | HBGA      | histo-blood group antigen                                 |
| 29 | HDX       | hydrogen/deuterium exchange                               |
| 30 | iDiD      | fully deamidated (2x isoD373) P dimer                     |
| 31 | iDN       | half deamidated (isoD373, native N373) P dimer            |
| 32 | $K_d$     | dissociation constant                                     |
| 33 | MD        | molecular dynamics                                        |
| 34 | NN        | fully native (2x native N373) P dimer                     |
| 35 | P domain  | protruding domain                                         |
| 36 | S domain  | shell domain                                              |
| 37 | SDS-PAGE  | sodium dodecyl sulfate polyacrylamide gel electrophoresis |
| 38 | VLP       | virus-like particle                                       |
| 39 | VP1       | major capsid protein                                      |
| 40 |           |                                                           |

## Glycan-induced protein dynamics in norovirus P dimers

### 41 **Abstract**

42 Noroviruses are the major cause of gastroenteritis and re-emerge worldwide every year, with GII.4  
43 currently being the most frequent human genotype. The norovirus capsid protein VP1 is essential  
44 for host immune response. The P domain mediates cell attachment via histo blood-group antigens  
45 (HBGAs) in a strain-dependent manner but how these glycan-interactions actually relate to cell  
46 entry remains unclear. Here, hydrogen/deuterium exchange mass spectrometry (HDX-MS) is  
47 used to investigate glycan-induced protein dynamics in P dimers of different strains, which exhibit  
48 high structural similarity but different prevalence in humans. While the almost identical strains  
49 GII.4 Saga and GII.4 MI001 share glycan-induced dynamics, the dynamics differ in the emerging  
50 GII.17 Kawasaki 308 and rare GII.10 Vietnam 026 strain. We also further examine structural  
51 effects of N373 deamidation upon glycan binding in partially deamidated GII.4 P dimers, which  
52 are likely present during infection. Such mixed species exhibit increased exposure to solvent in  
53 the P dimer upon glycan binding as opposed to pure wildtype. Furthermore, deamidated P dimers  
54 display increased flexibility and a monomeric population. Our results indicate that glycan binding  
55 induces strain-dependent structural dynamics, which are further altered by N373 deamidation, and  
56 hence hint at a role of deamidation in modulating cell attachment and entry in GII.4 strains.

57

## Glycan-induced protein dynamics in norovirus P dimers

### 58 Introduction

59 Noroviruses are non-enveloped single strand (+)sense RNA viruses of the *Caliciviridae* family that  
60 cause an estimated 20 % of gastroenteritis cases worldwide [1]. The virus possesses an  
61 icosahedral capsid, consisting of dimers of the major capsid protein VP1. A minor capsid protein  
62 VP2 is located inside the icosahedral shell. Based on its VP1 sequence, ten genogroups have  
63 been categorized, of which GI, II, IV, VIII and IX can infect humans [2]. Noroviruses of genogroup II  
64 (GII), especially genotype GII.4, dominated outbreaks in the last two decades [1]. With the  
65 emergence of new strains, e.g. GII.17 in Asia, it is an open question as to whether GII.4 will be  
66 displaced [3, 4] or resurgent [5].

67 VP1 is divided into the inner shell (S) domain and the outward-facing protruding (P) domain [6].  
68 The P domain is further subdivided into P1 and P2 subdomains, with P2 being essential for host  
69 immune response and binding to histo blood-group antigens (HBGAs) for cell attachment in a  
70 strain-dependent manner [7]. The importance of interactions with HBGAs for host cell attachment  
71 has been shown in several studies [8], but how these interactions actually mediate cell entry  
72 remains unclear.

73 In order to shed light on glycan contribution to cell entry several biophysical techniques including  
74 nuclear magnetic resonance (NMR), X-ray crystallography, native mass spectrometry (native MS)  
75 and hydrogen-deuterium exchange mass spectrometry (HDX-MS) have been applied to  
76 characterize binding of P dimers and whole virus-like particles (VLPs) to HBGAs and other glycans  
77 [9-17]. These studies revealed that glycan preferences and binding affinities are strongly  
78 genotype- and strain-dependent. For instance, crystallization studies showed that two fucose  
79 binding pockets on the top of the P dimer are highly conserved among different strains [8, 18],  
80 while in the GII.10 Vietnam 026 strain two additional binding sites located in the P2 cleft are  
81 occupied at high fucose concentrations [12].

## Glycan-induced protein dynamics in norovirus P dimers

82 Recently, NMR measurements identified a spontaneous deamidation of N373 with subsequent  
83 formation of an iso-aspartate (iD) in GII.4 Saga P dimers that strongly attenuates glycan binding.  
84 This deamidation appears to be site specific and occurs in GII.4 MI001 P dimers as well, whereas  
85 it is absent in GII.10 Vietnam 026 and GII.17 Kawasaki 308 P dimers, which carry an Asp at the  
86 equivalent position [19]. HDX-MS measurements confirmed the loss of binding of deamidated  
87 P dimers to HBGA B trisaccharide and revealed increased flexibility in the P2 domain compared  
88 to the wildtype P dimer.

89 HDX-MS measures the exchange of protein backbone hydrogens to deuterium in solution. As this  
90 exchange strongly depends on solvent accessibility and hydrogen bonding patterns, the method  
91 can provide information about regions involved in ligand binding as well as changes in protein  
92 dynamics in solution [20]. This makes it a valuable technique for identification of glycan induced  
93 structural dynamics in different strains as well as elucidation of altered protein dynamics in  
94 deamidated P dimers. While P dimers across strains are structurally highly similar, their glycan  
95 binding behavior and infectivity is highly variable, leading to the hypothesis that varying structural  
96 dynamics is causing these different profiles.

97 Therefore, we set out to examine whether glycan binding or deamidation can induce distinct  
98 structural dynamics changes in P dimers, thereby modulating infectivity. We specifically  
99 investigated binding of HBGA B trisaccharide and L-fucose to P dimers of GII.4 Saga, GII.4 MI001,  
100 GII.17 Kawasaki 308, and GII.10 Vietnam 026. GII.4 MI001 infects humans and mice [21] and has  
101 been chosen as comparison to the almost identical strain GII.4 Saga. GII.17 Kawasaki 308 is an  
102 emerging strain, and the less abundant GII.10 Vietnam 026 is capable of binding four fucose  
103 molecules per P dimer. The structural aspects of glycan binding to fully deamidated GII.4 P dimers  
104 have been investigated before [19]. However, *in vivo*, large fractions of partially deamidated P  
105 dimers with potentially altered dynamics are likely to occur. Therefore, we also examined glycan  
106 binding to partially deamidated GII.4 Saga and GII.4 MI001 P dimers.

## Glycan-induced protein dynamics in norovirus P dimers

107 Our targets share a different amount of sequence identity with the GII.4 Saga P dimer, but are  
108 highly similar on the structural level (Figure 1), with largest differences in the loop regions of the  
109 P2 domain. The results reveal identical glycan binding behavior in GII.4 Saga and GII.4 MI001  
110 strains but distinct glycan induced dynamics in GII.17 Kawasaki 308 and GII.10 Vietnam 026.  
111 Furthermore, all strains apart from GII.4 Saga form a second P domain species that is highly  
112 protected from HDX. In partially deamidated GII.4 P dimers, fucose binding leads to different  
113 structural dynamics than in pure wildtype or fully deamidated samples, hinting at a potential  
114 biological function. Moreover, molecular dynamics (MD) simulations with an aggregated  
115 simulation length of 14  $\mu$ s are employed to dissect the origin of observed differences.

116

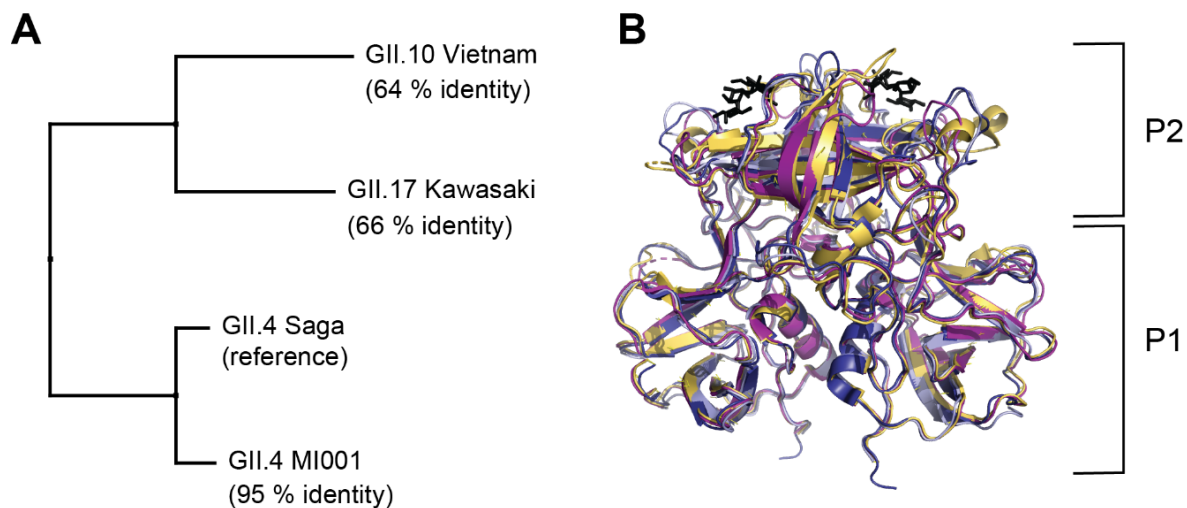

117

118 **Figure 1:** Comparison of human norovirus VP1 sequences (A) and P dimer structures with HBGA B  
119 trisaccharide (black) binding to the canonical binding site (B). P dimer sequences of three virus strains were  
120 aligned to the already investigated [19] GII.4 Saga strain as reference. For the GII.4 MI001 P dimer, a  
121 homology model was created for comparison using the GII.4 Farmington Hills P dimer structure with 94%  
122 sequence identity to MI001 as reference. Crystal structures of GII.4 Saga (pdb 4X06, dark blue), GII.10  
123 Vietnam (pdb 3ONY, yellow), GII.17 Kawasaki (pdb 5F4O, purple) and the homology modelled structure of  
124 GII.4 MI001 (light blue) were superimposed in PyMOL with the following RMSDs to GII.4 Saga: 7.4 Å (GII.10  
125 Vietnam), 6.5 Å (GII.17 Kawasaki), 1.6 Å (GII.4 MI001). P1 and P2 indicate the respective domains of the  
126 P dimer.

## Glycan-induced protein dynamics in norovirus P dimers

### 127 Material and Methods

#### 128 Expression and purification of P dimers

129 GII.4 Saga 2006 (VP1 residues 225–530), GII.4 MI001 (VP1 residues 225–530), GII.10 Vietnam  
130 026 (VP1 residues 224–538), and GII.17 Kawasaki 308 (VP1 residues 225–530) P domains (see  
131 Figure S1 for VP1 sequence alignment), with GenBank accession numbers AB447457,  
132 KC631814, AF504671, and LC037415, respectively, were synthesized and purified as described  
133 elsewhere [19]. Briefly, *E. coli* BL21(DE3) were transformed with a pMal-c2x expression vector  
134 encoding the genes for ampicillin resistance, a fusion protein of maltose-binding protein, two His-  
135 tags, an HRV 3C cleavage domain, and the P domain. Due to the cloning strategy, the sequences  
136 from GII.4 Saga 2006 and GII.17 Kawasaki 308 2015 P domains contain an extra GPGS sequence  
137 preceding K225, whereas GII.10 Vietnam 026 contains a GPG sequence preceding S224.  
138 Transformed cells were grown for 3 h at 37 °C. Overexpression was induced with 1 mM isopropyl-  
139  $\beta$ -D-1-thiogalactopyranoside (IPTG) at an OD<sub>600</sub> value of 1.5. Incubation was continued at 16 °C  
140 for 48 h. Cells were lysed using a high-pressure homogenizer (Thermo). The lysate was clarified  
141 by centrifugation, and the fusion protein was purified using a Ni-NTA resin (Qiagen). MBP and the  
142 His-tag were cleaved from the P domain using HRV 3C protease (Novagen). Cleaved P domain  
143 protein eluted from Ni-NTA resin and was further purified by size-exclusion chromatography using  
144 a Superdex 16/600 200 pg column (GE Healthcare) in 20 mM sodium phosphate buffer (pH 7.3).  
145 Protein purity and dimer concentration were monitored by SDS-PAGE and ultraviolet absorption.  
146 Separation of fully, partially, and non-deamidated (pure N373 wildtype) GII.4 P dimer species was  
147 achieved by cation exchange chromatography using a 6 ml Resource S column (GE Healthcare)  
148 at 6 °C. After separation protein samples were prepared in 20 mM sodium acetate buffer (pH 4.9)  
149 to prevent further spontaneous deamidation and eluted using a linear salt gradient.

## Glycan-induced protein dynamics in norovirus P dimers

150 Wildtype P dimer samples were stored at 5 °C in the following buffers until analysis: GII.10  
151 Vietnam: 25 mM TrisHCl, 300 mM NaCl, pH 7.3; GII.17 Kawasaki, GII.4 Saga and GII.4 MI001:  
152 20 mM sodium acetate, 100 mM NaCl pH 4.9 (the last two pure wildtype N373). To create mixed  
153 species of wildtype (NN), partially deamidated (iDN) and fully deamidated (iDiD) GII.4 MI001 and  
154 GII.4 Saga P dimer [19], pure wildtype (NN) P dimer samples were stored at pH 7.3, which favors  
155 spontaneous deamidation, for several months. The storage conditions were 25 mM TrisHCl,  
156 300 mM NaCl, pH 7.3, 4 °C for GII.4 MI001 P dimer and 75 mM sodium phosphate buffer, 100 mM  
157 NaCl, pH 7.3, 4 °C for GII.4 Saga P dimer.

158

## 159 Glycan structures

160 Methyl  $\alpha$ -L-fucopyranoside ( $\alpha$ -L-Fuc-(1,0)-CH<sub>3</sub>) and HBGA B trisaccharide ( $\alpha$ -D-Gal-(1,3)-[ $\alpha$ -L-  
161 Fuc-(1,2)]- $\beta$ -D-Gal-(1,0)-CH<sub>3</sub>) were purchased from Carbosynth.

162

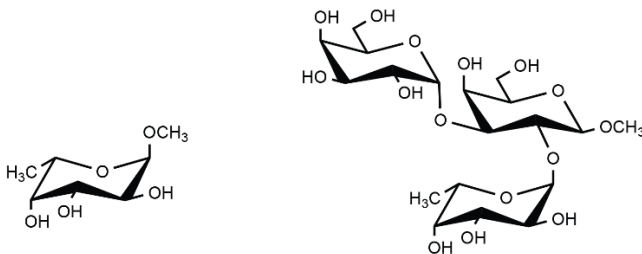

163 Methyl  $\alpha$ -L-fucopyranoside      HBGA B trisaccharide

164

## 165 Native MS

166 Native MS measurements were performed using 3 to 4.5  $\mu$ M purified P dimers. Proteins were  
167 subjected to buffer exchange to different concentrations of ammonium acetate (GII.10 Vietnam:  
168 125 mM; GII.17 Kawasaki and GII.4 Saga: 300 mM; GII.4 MI001: 250 mM) at pH 7.5 and 4°C via  
169 centrifugal filter units (13000 x g, Vivaspin 500, MWCO 10000 (Sartorius) or Micro Bio-Spin 6



## Glycan-induced protein dynamics in norovirus P dimers

170 columns (Bio-Rad)) according to the manufacturers' protocols. Mass spectra were acquired at  
171 room temperature (25 °C) in positive ion mode on an LCT mass spectrometer modified for high  
172 mass (Waters, UK and MS Vision, the Netherlands) with a nano-electrospray ionization (ESI)  
173 source. Gold-coated electrospray capillaries were produced in house for direct sample infusion.  
174 Capillary and sample cone voltages were 1.20 kV to 1.35 kV and 150 to 240 V, respectively. The  
175 pusher was set to 100-150  $\mu$ s. Pressures were 7 mbar in the source region and  $6.2 \times 10^{-2}$  to  $6.5 \times$   
176  $10^{-2}$  mbar argon in the hexapole region. A spectrum of a 25 mg/ml cesium iodide solution from the  
177 same day was applied for calibration of raw data using the MassLynx software (Waters, UK).  
178 OriginPro 2016 (Origin Lab Corporation) software was used for peak integration and calculation  
179 of oligomer fractions.

180

## 181 HDX-MS

182 P dimers (30-50 pmol) were mixed with glycans at tenfold of the final concentration (final: 10 mM  
183 HBGA B trisaccharide, 100 mM fucose) and directly diluted 1:9 in 99% deuterated 20 mM Tris  
184 buffer (pH 7, 150 mM NaCl, 25°C) to start the exchange reaction. After various time points the  
185 exchange reaction was quenched by 1:1 addition of ice-cold quench buffer (300 mM phosphate  
186 buffer, pH 2.3, 6 M urea), which decreased the pH to 2.3, and frozen in liquid nitrogen. As a fully  
187 deuterated (FD) control, P dimers were diluted 1:9 in 99% deuterated 20 mM Tris buffer with  
188 150 mM NaCl and 6 M urea at pH 7, labelled for 24-72 h at room temperature and quenched as  
189 described above.

190 Samples were thawed and injected onto a cooled (2 °C) HPLC System (Agilent Infinity 1260,  
191 Agilent Technologies) equipped with a home packed pepsin column (IDEX guard column with an  
192 internal volume of 60  $\mu$ L, Porozyme immobilized pepsin beads, Thermo Scientific) in a column  
193 oven (25 °C), a peptide trap column (OPTI-TRAP for peptides, Optimize Technologies) and a  
194 reversed-phase analytical column (PLRP-S for Biomolecules, Agilent Technologies). Pepsin

## Glycan-induced protein dynamics in norovirus P dimers

195 digestion was performed online at a flow rate of 75  $\mu$ L/min (0.4 % formic acid in water) and  
196 peptides were trapped in the trap column. Peptides were eluted and separated on the analytical  
197 column using a 7 min gradient of 8-40 % solvent B (solvent A: 0.4 % formic acid in water, solvent  
198 B: 0.4 % formic acid in acetonitrile) at 150  $\mu$ L/min. MS was performed using an Orbitrap Fusion  
199 Tribrid in positive ESI MS only mode (Orbitrap resolution 120000, 4 microscans).

200 All time points were performed in three technical replicates, apart from the 8 h time point of GII.10  
201 Vietnam with fucose, which only represents a single measurement. The triplicate measurement of  
202 GII.4 MI001 P dimer was influenced by peptide carry over, which overlaid with the lower  
203 deuterated peak distribution and led to a falsely high intensity. Therefore, a separate single-  
204 replicate measurement with additional pepsin column washing (2 M urea, 2 % acetonitrile, 0.4 %  
205 formic acid, pH 2.5) between sample injections was performed to minimize carry over and only  
206 deuteration differences, which are present in both datasets, are considered real.

207

## 208 Peptide and PTM identification

209 Identification of peptides and post-translational modifications (PTM) was performed on non-  
210 deuterated samples using a 27 min elution gradient of 8-40 % solvent B in data-dependent MS/MS  
211 acquisition mode (Orbitrap resolution 120000, 1 microscan, HCD 30 with dynamic exclusion).  
212 Precursor and fragment ions were searched and matched against a local protein database just  
213 containing the protein of interest in MaxQuant (version 1.5.7.0) using the Andromeda search  
214 engine [22]. The digestion mode was set to “unspecific” and N-terminal acetylation, deamidation,  
215 oxidation and disulfide bond formation were included as variable modifications with a maximum  
216 number of 5 modifications per peptide. Peptides between 5 and 30 amino acids length were  
217 accepted. The MaxQuant default mass tolerances for precursor (4.5 ppm) and fragment (20 ppm)  
218 ions defined for the Thermo Orbitrap instrument were used for data search. The minimum score  
219 for successful identifications was set to 20 for unmodified and 40 for modified peptides. For

## Glycan-induced protein dynamics in norovirus P dimers

220 peptides carrying a deamidation, spectra were checked manually and chromatographic peak  
221 areas were calculated in Xcalibur (Thermo Scientific) to obtain a wildtype/deamidated peptide  
222 ratio.

223

### 224 **HDX data analysis**

225 DeutEx software (obtained from [peterslab.org](http://peterslab.org)) was used to determine the deuterium uptake via  
226 centroid analysis. Excel (Microsoft), GraphPad Prism (GraphPad Software, Inc.), OriginPro 2016  
227 (Origin Lab Corporation) and PyMOL (Schrödinger) software were used for data visualization and  
228 statistical analysis. For comparison of triplicate data, a two-sided Student's T-test using  
229 deuteration differences from centroid analysis was used with the  $\alpha$ -value set to 0.05. A peptide  
230 was only considered to have a significant HDX difference if the peptide passed the T-test and  $\Delta D$   
231 exceeded 2x the pooled average standard deviation [23, 24] of the dataset either for several time  
232 points or for the same time point in overlapping peptides. For some peptides deuteration of FD  
233 controls was lower than deuteration of the 8 h labeling time point. Therefore, datasets were not  
234 normalized to the absolute FD deuterium uptake and only relative differences between states are  
235 presented. For comparison of the unbound wildtype and deamidated MI001 P dimer, the ratio of  
236 the FD controls from both measurements was used for normalization. Additionally, a higher cut-  
237 off of  $\Delta D > 0.42$  (99% percentile calculated according to [25]) was used to account for possible  
238 day-to-day variation in the experimental conditions. Regions with significant deuterium uptake  
239 differences were mapped to existing P dimer crystal structures or the homology model (GII.4  
240 MI001).

241 Deuterated spectra of peptides in certain protein regions showed bimodal peak distributions that  
242 led to lower deuteration values in centroid analysis. To validate the deuteration differences  
243 observed in centroid data analysis and to calculate relative intensities of both peak distributions,  
244 bimodal spectra of peptides representative for certain regions were analyzed by binomial fitting in

## Glycan-induced protein dynamics in norovirus P dimers

245 HXExpress [26]. To compare relative intensities of both distributions in different states, an average  
246 over all bimodal time points for both distributions in each state was calculated for several peptides.  
247 Averaged relative intensities of the first peak distribution in different peptides are presented as bar  
248 plots in Figure 3. The statistical significance of relative intensity differences of the first peak  
249 distribution in different states were analyzed with a two-sided Student's T-test for each pair of  
250 states (unbound vs. ligand-bound) in an individual experiment ( $p < 0.05$ ). Peptide coverage maps,  
251 indicating the effective peptide coverage in each HDX experiment, were plotted with MS Tools  
252 [27] and can be found in the supplement (Figures S12-16).

253

## 254 **Experimental Design and Statistical Rationale**

255 The rationale for experimental design and data analysis is based on HDX-MS community-  
256 recommendations [28]. In brief, sample quality was assessed with native MS and HDX-MS  
257 conditions were optimized for maximum sequence coverage and detection sensitivity. Labeling  
258 time points were chosen to cover 3-4 orders of magnitude. Three independent labeling reactions  
259 were performed for each time point and the level of back exchange was assessed with a fully  
260 deuterated protein control as well as a mix of deuterated model peptides. Details about the peptide  
261 identification method, statistical analysis with Student's T-test and color mapping procedure are  
262 given in the individual methods sections. Fragmentation spectra for identification of deamidated  
263 peptides are given in the supplement (Figures S3-9). All HDX-MS data has been manually  
264 inspected and exchange differences in bimodal peak distributions have been validated by binomial  
265 fitting. HDX summary tables with detailed information about experimental conditions and statistics  
266 as well as deuterium uptake plots for each dataset can be found in the supplement (Table S3 and  
267 Figures S24-32).

## 268 **Structure and sequence alignment**

## Glycan-induced protein dynamics in norovirus P dimers

269 GII.4 Saga, GII.4 MI001, GII.10 Vietnam and GII.17 Kawasaki VP1 protein sequences were  
270 aligned with T-Coffee [29] and visualized with Jalview (version 2.11.0) [30]. A phylogenetic tree  
271 was created in Jalview with BLOSUM62 and Neighbor joining. GII.4 Saga (pdb 4X06), GII.10  
272 Vietnam (pdb 3ONY) and GII.17 Kawasaki (pdb 5F4O) P dimer crystal structures were  
273 superimposed in PyMOL.

274

## 275 **Homology modeling of GII.4 MI001 P dimer structure**

276 The SWISS-MODEL template library [31] [32] SMTL version 2019-10-24, PDB release 2019-10-  
277 18 was searched with BLAST [33] and HHBlits [34] for evolutionary related structures matching  
278 the GII.4 MI001 P dimer target sequence. Based on the search results the GII.4 Farmington Hills  
279 P dimer structure (pdb 4OOV, 94 % sequence identity) was used for model building. Models were  
280 built based on the target-template alignment using ProMod3. The global and per-residue model  
281 quality has been assessed using the QMEAN scoring function [35]. The resulting GMQE (Global  
282 Model Quality Estimation) was 0.99 and QMEAN was 0.57 indicating very good accuracy and  
283 quality of the model structure (Figure S2).

284

## 285 **MD simulations**

286 We performed molecular dynamics (MD) simulations on the following proteins: GII.4 Saga (pdb  
287 4X06), GII.4 Saga containing a deamidated P domain (pdb 6H9V) (iDN), GII.4 MI001 (pdb 4OOV),  
288 GII.10 Vietnam (3ONU), GII.17 Kawasaki (5F4O). An additional proteoform was generated  
289 comprising fully deamidated P dimers at residue 373 in both peptide chains, based on GII.4 Saga  
290 (pdb 6H9V) (iDiD). All pdb-structures were refined by adding missing atoms and residues using  
291 the UCSF Chimera tool (version 1.14) [36]. GII.4 Saga P dimers were additionally simulated with  
292  $\alpha$ -L-methyl-fucose (F) ligands to explore a potential influence of deamidation on protein dynamics.

## Glycan-induced protein dynamics in norovirus P dimers

293 Hence, the amount of systems is expanded to include wildtype GII.4 Saga P dimers (pdb 4X7C)  
294 (NN) with one ( $N_F N$ ) and two ( $N_F N_F$ ) fucose ligands, iDN P dimers with one fucose complexing  
295 each individual chain ( $iD_F N$  and  $iD N_F$ ), and two fucoses ( $iD_F N_F$ ), and further include iDiD P dimers  
296 with one ( $iD_F iD$ ) and two ( $iD_F iD_F$ ) fucose ligands.

297 All MD simulations were performed using Gromacs on the Rackham cluster of the Uppsala  
298 Multidisciplinary Center for Advanced Computational Science (UPPMAX), and the Kebnekaise  
299 cluster at the High Performance Computing Center North (HPC2N) [37]. The amber99sb force  
300 field was utilized for all simulations [38], modified to include parameters for iD and F [39]. The  
301 MkVsites tool provided virtual sites and dummy-mass constructions for F [40]. Structures were  
302 placed in a dodecahedral box under periodic boundary conditions, solvated using the TIP3P water  
303 model [41], and neutralized in a 154 mM saline solution by adding NaCl. Protonation states of all  
304 systems were based on the sidechains' pKa at pH 7. Each system was minimized using the  
305 steepest descent algorithm, followed by a 100 ps simulation with applied position-restrains.  
306 Temperature and pressure were maintained at 300 K and 1 bar by the v-rescale thermostat and  
307 the Parrinello—Rahman barostat, with coupling constants of 50 fs for both [42-44]. Neighbor lists  
308 were updated every 10 steps. The particle mesh Ewald algorithm was used for Coulomb  
309 interactions, with a real-space cut-off of 1.0 nm [45, 46]. The systems were allowed to relax for  
310 100 ns with a 5 fs time step, extracting one frame every 10<sup>th</sup> ns as starting structures for the  
311 production runs. Final simulations were performed for ten 100 ns production runs at a 5 fs time  
312 step. As such, each of the 14 systems was simulated in 10 replicates from different starting  
313 structures, resulting in an aggregated simulation time of 1  $\mu$ s per system, making 14  $\mu$ s in total for  
314 all systems.

315 The root-mean-square deviation (RMSD) and fluctuation (RMSF), as well as the solvent  
316 accessible surface area ( $A_{sas}$ ), were calculated to analyze the behavior of each system. The  
317 RMSD was computed with the first frame of the individual trajectory as reference structure. The  
318 trajectories of the ten replicas were combined to a single trajectory, of which the average structure

## Glycan-induced protein dynamics in norovirus P dimers

319 was calculated with the Gromacs software package. This average structure was then taken as  
320 reference for RMSF calculations, as this most accurately represents the standard deviation of the  
321 individual atomic positions. To further support the RMSF calculations, we computed the  $A_{sas}$  of the  
322 protein backbone for the initial conformation (pdb-structure) and the final production simulations,  
323 of which latter was combined to an average representation of the area over all ten production  
324 replicas. The resulting values were subtracted from each other, to eventually visualize an increase  
325 or decrease of the  $A_{sas}$  after 100 ns. The RMSF and  $A_{sas}$  values for the different P dimer strains  
326 were aligned with the sequence to compare each residue between the dimers.

327

### 328 **Data availability**

329 Full HDX data tables as well as MS raw data and peptide identification results have been deposited  
330 to the ProteomeXchange Consortium [47] via the PRIDE [48] partner repository (dataset identifier  
331 PXD019884). Annotated fragment ion spectra of all protein/peptide identifications can be viewed  
332 with MS-Viewer using the respective search keys given in the supplement (Table S4).

333

## Glycan-induced protein dynamics in norovirus P dimers

### 334 Results

#### 335 **P dimer quality control by peptic digest and native MS**

336 To verify the deamidation status P dimer samples were subjected to peptic cleavage followed by  
337 LC-MS for peptide identification (Table S2). No deamidated peptides were identified for GII.10  
338 Vietnam and GII.17 Kawasaki after 1 year and 4 months (Vietnam) and 1 year (Kawasaki) of  
339 storage at 5°C, respectively. For GII.4 MI001 P dimers stored for 1 year at pH 7.3 and 5°C, a  
340 fraction of approximately 64 % was deamidated at N373. Based on this the ratio of purely native  
341 (NN) to half deamidated (iDN) to fully deamidated (iDiD) P dimers is statistically predicted as  
342 13:46:41 %. Furthermore, a minor fraction was deamidated at N239 and N448, respectively. For  
343 GII.4 MI001 P dimers stored at pH 4.9 for 5 months at 5°C, no deamidation of N373 was observed.  
344 Only a small fraction (< 10 %) of deamidated N448 was identified. GII.4 Saga P dimers stored for  
345 more than 2 years at pH 7.3 at 5°C were approximately 88 % deamidated at N373 leading to a  
346 ratio of NN:iDN:iDiD of 1.5:21:77.5 % (Table S1 and Figures S3-9).

347 Prior to HDX-MS analysis P dimers were subjected to native MS for quality control. Furthermore,  
348 ion exchange separated wildtype (NN) and fully deamidated (iDiD) GII.4 Saga P dimers were  
349 measured for comparison. GII.17 Kawasaki, GII.10 Vietnam, wildtype GII.4 MI001 and wildtype  
350 GII.4 Saga P domains showed dimers with the expected molecular masses, apart from a small  
351 fraction of unspecific tetramers formed during the ESI process (Figure S10). Interestingly, both  
352 deamidated GII.4 P domains were also present as monomers. Increased monomer fractions  
353 correlate with the extent of N373 deamidation: 16 % monomers are detected for the 64 %  
354 deamidated GII.4 MI001 sample, and 32 % monomers are found for the 100 % deamidated GII.4  
355 Saga sample (Table S2). As deamidation rates in these strains are identical [49] this suggests that  
356 monomers are a result of iDiD P dimer dissociation, while iDN species are still primarily dimeric.

357



## Glycan-induced protein dynamics in norovirus P dimers

### 358 **Bimodality of deuterated peak distributions points towards a second, more** 359 **protected population**

360 Based on glycan binding data for GII.4 Saga P dimers [19, 49], we wanted to expand our HDX MS  
361 experiments to P dimers of other human norovirus strains to analyze possible strain specific  
362 differences in the structural response to glycan binding. Therefore, we incubated GII.4, GII.10 and  
363 GII.17 P dimers with 10 mM HBGA B trisaccharide or 100 mM fucose at pH 7 and measured  
364 differences between the unbound and ligand-bound state using HDX-MS. During inspection of the  
365 glycan binding data, we observed that deuterated spectra of some peptides had a bimodal  
366 character with one low intense, low deuterated and a second high intense, higher deuterated peak  
367 distribution (Figure 2A). These bimodal peak distributions can have many causes, e.g. two distinct  
368 protein conformations, conformational rearrangements that lead to EX1 exchange kinetics,  
369 insufficient ligand saturation or peptide carry over from the analytical or protease column [50, 51].  
370 To rule out effects induced by carry over, an additional dataset with randomized sample order and  
371 additional washing of the pepsin column between sample injections was measured for GII.4 MI001  
372 wildtype (wt, N373) P dimers incubated with fucose, which still showed bimodality. Moreover,  
373 bimodality is also observed in absence of any ligand, strongly indicating that undersaturated  
374 binding sites are not the origin of bimodality. Furthermore, ligand concentrations were chosen to  
375 provide high and comparable saturation of binding sites. HBGA B trisaccharide affinities are  
376 almost identical for GII.4 Saga and GII.4 MI001 P dimers [49]. Assuming that P dimers of other  
377 strains bind glycans with affinities similar to GII.4 P dimers, binding pocket occupancy can be  
378 estimated based on  $K_d$  values measured by NMR (GII.4 Saga (NN):  $K_d = 5.5$  mM for HBGA B  
379 trisaccharide and  $K_d = 22$  mM for fucose) [19]. Binding of HBGA B trisaccharide in our setup would  
380 hereby correspond to 95 % binding site occupancy during equilibration with ligand (98 % for  
381 fucose) and 65 % during deuterium labeling (82 % for fucose). For GII.4 P dimers, recent chemical  
382 shift perturbation titrations demonstrate the presence of two independent HBGA binding sites [19,

## Glycan-induced protein dynamics in norovirus P dimers

383 49]. The presence of four fucose binding sites shown for GII.10 Vietnam P dimers in the presence  
384 of high fucose concentrations appears to be an exception [12].

385 Bimodality can be seen for P dimers of GII.4 MI001, GII.10 Vietnam and GII.17 Kawasaki in the  
386 unbound proteins as well as in ligand bound forms. However, no bimodality is observed for GII.4  
387 Saga P dimers [19]. For all three strains, bimodality is almost exclusively present in the P2 domain  
388 and in the lower part of the P1 domain (Figure 2B). Peptides that are affected by glycan binding  
389 are often bimodal as well; therefore, it was necessary to manually analyze deuteration differences  
390 in these regions again by binomial fitting of the individual peak distributions (an example analysis  
391 can be seen in Figure S11). Residues 334-354, for example, are bimodal and also involved in  
392 glycan binding in all three strains. However, not all peptides that are protected upon glycan binding  
393 are bimodal. Peptides covering the canonical binding site are unimodal in GII.17 Kawasaki and  
394 GII.10 Vietnam and only show slight bimodality in GII.4 MI001 in the presence of fucose.

395 Relative intensities of the individual peak distributions are constant over time (Figure S11) and  
396 highly similar for peptides within the same protein, which lead us to the assumption that the  
397 P dimer adopts two distinct conformations, a compact and a more flexible one. The relative  
398 intensity ratios of the peak distributions vary between experiments, but can still be compared within  
399 a certain experiment (Figure 2C). Depending on the strain and the experiment, the relative  
400 intensity of the first peak distribution in the unbound P dimer varies between 7 and 17 %. For  
401 GII.17 Kawasaki and GII.4 MI001 P dimers, incubation with HBGA B trisaccharide has no  
402 significant effect on the relative intensity of the first distribution, while there is a slight increase for  
403 GII.10 Vietnam P dimers. Presence of fucose, in contrast, significantly increases the relative  
404 intensity of the first distribution in all strains. While there is only a slight increase for GII.17  
405 Kawasaki P dimers, the relative intensity of the first distribution increases by a factor of 2 for GII.10  
406 Vietnam and GII.4 MI001 P dimers.

407

## Glycan-induced protein dynamics in norovirus P dimers

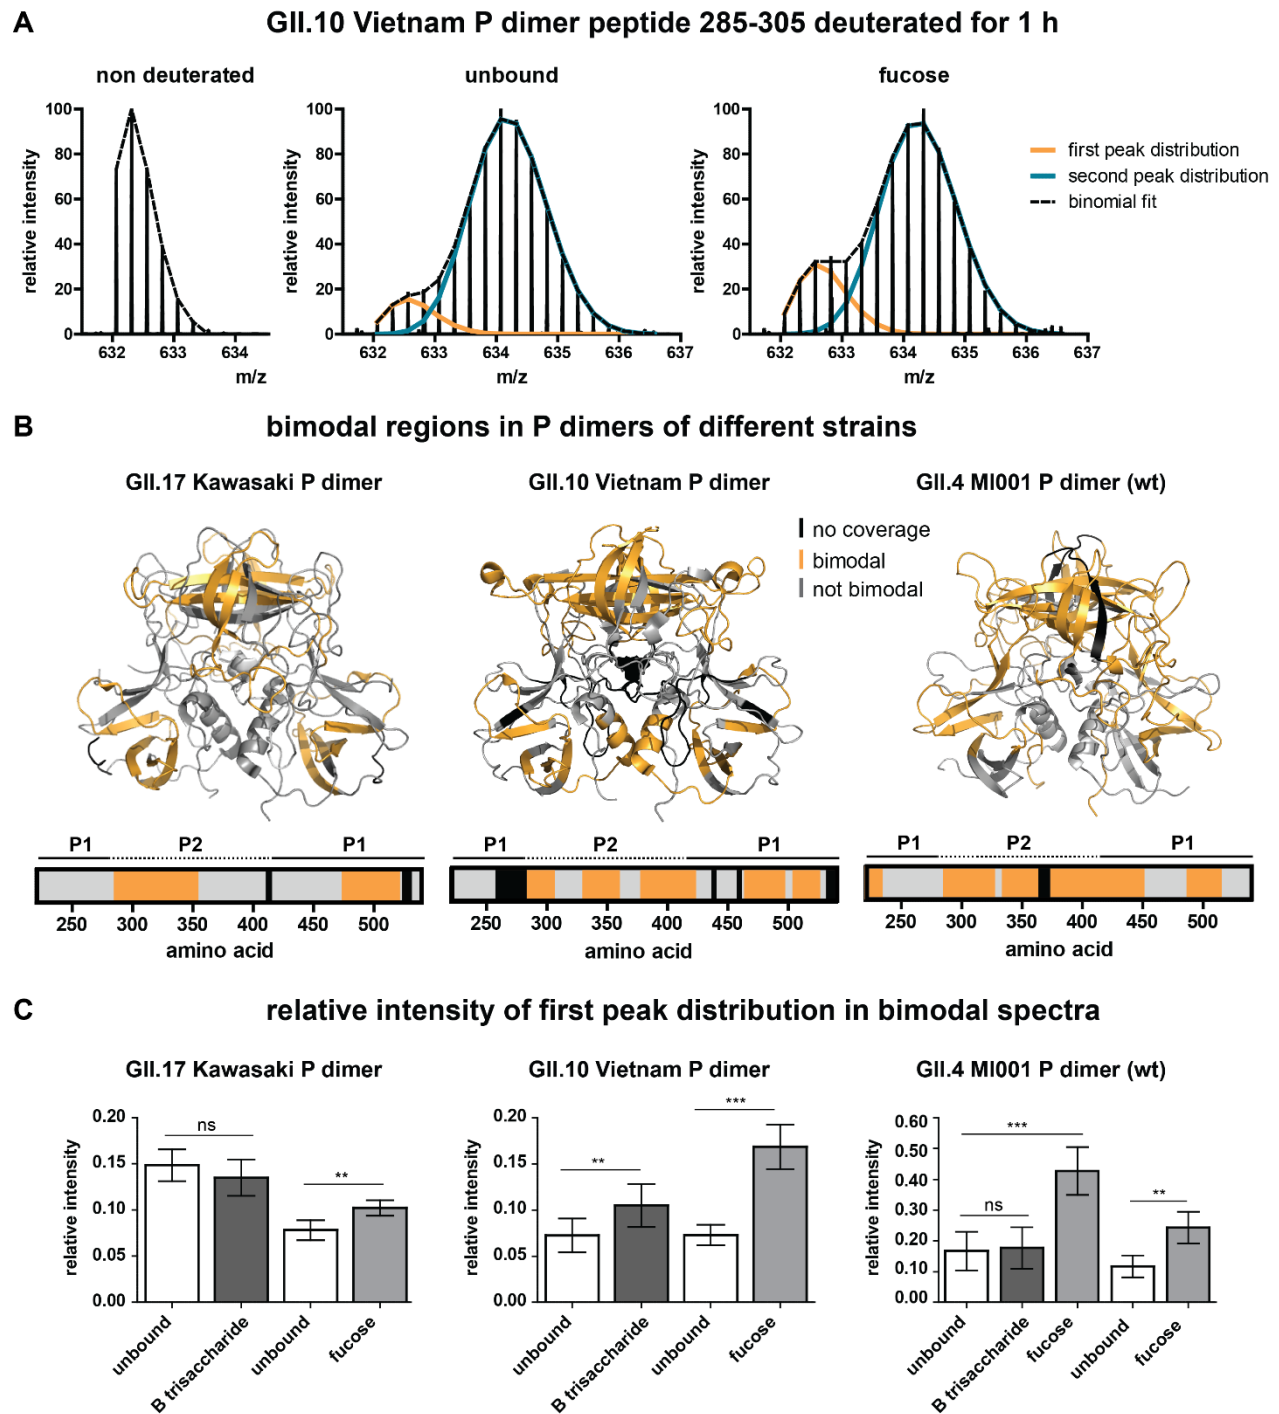

408  
 409 Figure 2: Bimodal peak distributions in some peptides point towards the existence of a second, more  
 410 protected population. A) Bimodality in deuterated spectra of an exemplary peptide of the GII.10 Vietnam P  
 411 dimer. Bimodality occurs in both the unbound and the glycan bound state. Single peak distributions can be  
 412 separated by binomial fitting. B) Regions in P dimers of different strains that show bimodality in deuterated  
 413 spectra (orange). Bimodality mainly occurs in the P2 domain and the lower part of the P1 domain in all

## Glycan-induced protein dynamics in norovirus P dimers

414 strains. The amino acid numbering is based on the VP1 sequence. C) Relative intensity of the first (lower  
415 deuterated) peak distribution for different strains and experiments calculated by binomial fitting. For GII.4  
416 MI001 both HDX-MS experiments are shown (triplicate measurement with B trisaccharide and fucose vs.  
417 single replicate measurement with fucose and additional wash steps between the injections to eliminate  
418 peptide carry over from the pepsin column). Relative intensity of the first peak distributions stays constant  
419 over time, so the averages over all bimodal time points for all states were calculated for several peptides of  
420 different protein regions and combined into bar graphs. The error bar represents the standard deviation of  
421 the average relative intensity calculated from  $N \geq 5$  peptides. Significant differences between the unbound  
422 and the glycan bound state were assessed using a two-sided Student's T-test for each pair in an individual  
423 experiment. P values are indicated by asterisks:  $p < 0.001$  (\*\*\*),  $p < 0.01$  (\*\*) and not significant (ns).

### 424 **Analysis of glycan induced changes in P dimers of different strains by HDX-** 425 **MS**

426 Most of the deuteration changes in presence of HBGA B trisaccharide or fucose are detected in  
427 peptides that show bimodality. This commonly causes falsely low deuteration differences in  
428 centroid analysis, so individual binomial fitting of the two peak distributions was performed for  
429 some representative peptides in these regions to validate the observed deuteration differences in  
430 the main (second) peak distribution. As expected, binding of HBGA B trisaccharide and fucose  
431 induces changes in P dimers of all three strains, primarily in the P2 domain, indicating occupation  
432 of the glycan binding pocket (Figure 3). Protected regions in wildtype GII.4 MI001 P dimers are  
433 highly similar to GII.4 Saga P dimers [19] for both glycans (canonical binding site G443, Y444 and  
434 residues 283-303). In addition, protection of a  $\beta$ -sheet region in the top cleft of the P2 domain  
435 (residues 333-353) can be detected in GII.4 MI001 in presence of HBGA B trisaccharide. Chemical  
436 shift perturbations (CSP) in this region could also be seen in NMR experiments with GII.4 Saga  
437 P dimers in presence of glycans [19, 49]. Overall, protected regions in GII.4 MI001 match with  
438 regions showing CSPs in GII.4 Saga NMR data, suggesting that both strains respond similarly to  
439 glycan binding.

## Glycan-induced protein dynamics in norovirus P dimers

440 Protection of residues 333-353 in the P2 domain can be seen in all three strains. For GII.17  
441 Kawasaki P dimers, significant protection in presence of HBGA B trisaccharide is only present in  
442 this specific region. When incubated with fucose, additional protection of the canonical glycan  
443 binding site (G443, Y444) and residues 269-286, located in the protein center below the P2  
444 domain, can be detected (Figure 3 A). In contrast to GII.4 MI001 and GII.17 Kawasaki, GII.10  
445 Vietnam P dimers show protection in the P2 domain including the canonical binding site (G451,  
446 Y452) and the  $\beta$ -sheet region in the binding cleft, but also in the lower part of the P1 domain  
447 (Figure 3 D). All observed differences can only be seen in the second, highly deuterated peak  
448 distribution. The lowly deuterated peak distribution showed no significant differences between the  
449 unbound and the glycan-bound state in any of the strains indicating that either only the highly  
450 deuterated species can bind glycans or labeling time was too short to detect deuteration  
451 differences in already strongly protected regions.  
452

## Glycan-induced protein dynamics in norovirus P dimers

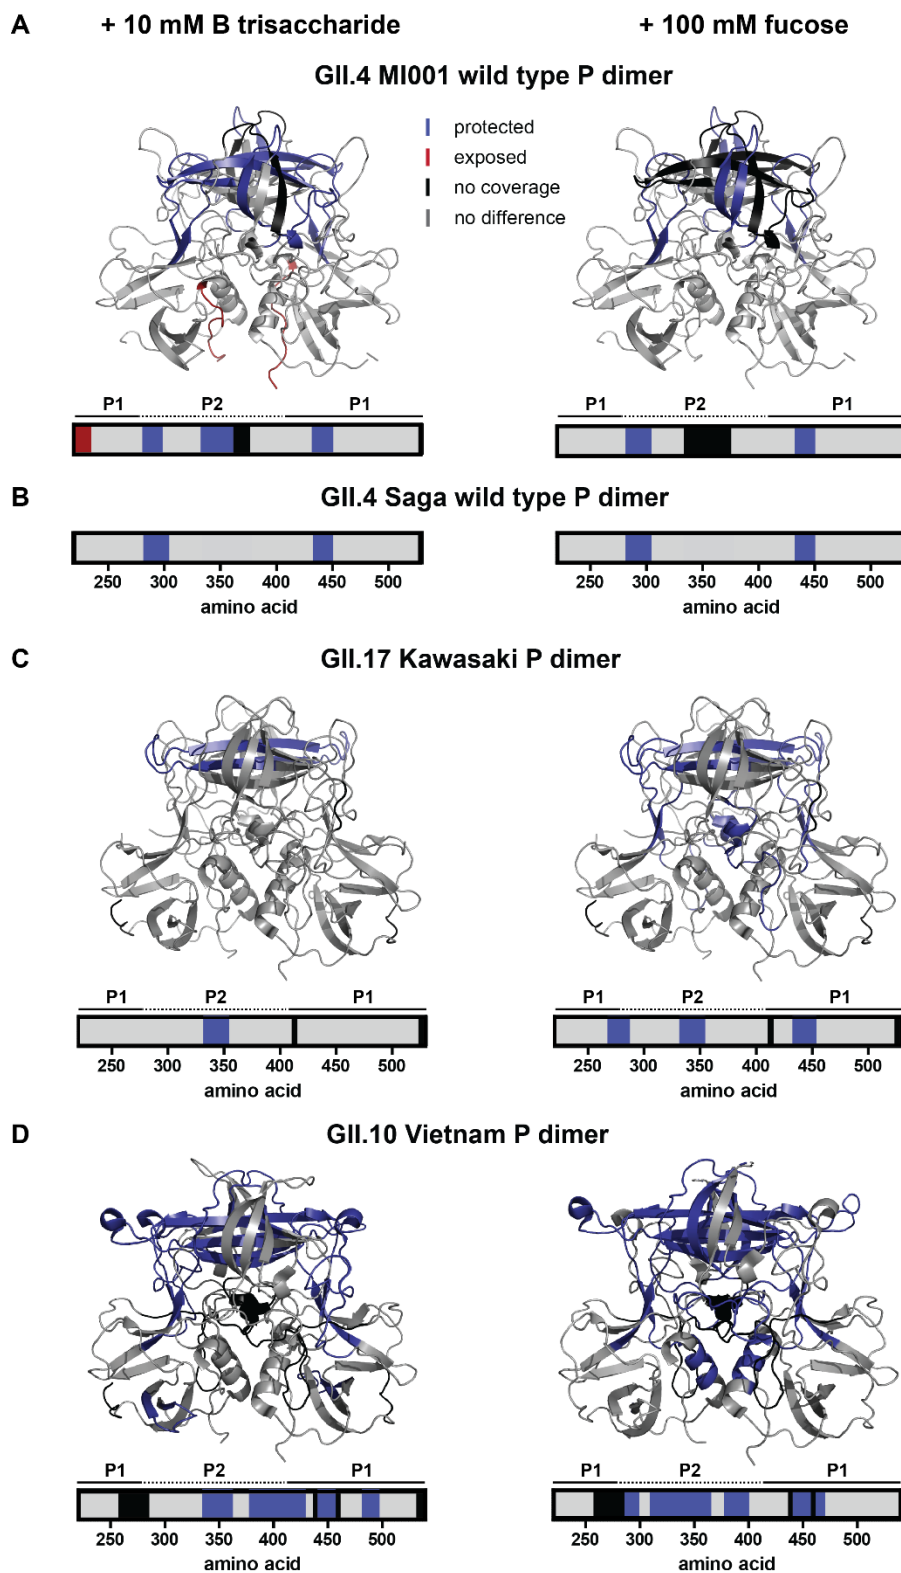

453  
454 Figure 3: HDX differences upon glycan binding in human GII.4 MI001 (A), GII.17 Kawasaki 308 (C) and  
455 GII.10 Vietnam (D) norovirus P dimers. (B) Protected regions in wildtype GII.4 Saga P dimers are shown for  
456 comparison [19]. Depicted are protein regions with significant differences in deuterium uptake between

## Glycan-induced protein dynamics in norovirus P dimers

457 unbound P dimers and P dimers with either 10 mM HBGA B trisaccharide or 100 mM fucose ( $p < 0.05$ ,  
458 Student's T-test and  $\Delta D > 2x$  pooled average SD). The deuteration difference in the second peak distribution  
459 was manually validated by binomial fitting in case of bimodal spectra. Bar graphs and colored structures  
460 indicate regions of P dimers, which get more protected (dark blue) or exposed (red) upon interaction with  
461 glycans. Areas colored in grey showed no significant difference in the chosen HDX time regime and black  
462 areas have no peptide coverage. P1/P2 refers to the two domains of the P dimer (shown in Figure 1).

## 463 **Influence of N373 deamidation on dynamics and glycan binding of GII.4**

### 464 **P dimers**

465 To study the influence of partial vs. complete deamidation of N373 on glycan binding [19] (Figure  
466 4C), HDX-MS experiments with partially deamidated GII.4 MI001 and GII.4 Saga P dimer samples  
467 in the presence of 100 mM fucose were performed. Strikingly, protection of the canonical fucose  
468 binding site (G443, Y444) could be detected in both strains (Figure 4 A/B). This shows that fucose  
469 binding is still possible in partially deamidated (iDN) or even fully deamidated (iDiD) P dimers at  
470 the given concentration, even though binding is attenuated compared to the N373 wildtype [19].  
471 Occupation of the canonical binding sites has been seen in crystal structures of deamidated GII.4  
472 Saga P dimers at elevated concentrations of 600 mM fucose, but binding interactions were slightly  
473 different from wildtype [19]. In contrast to wild type GII.4 MI001 P dimer, no other region was  
474 protected from HDX under fucose treatment, but increased deuteration in the main peak  
475 distribution was observed in the P2 domain of both GII.4 strains, suggesting a more exposed  
476 conformation. Interestingly, residues 335-362, which are protected in the wildtype proteins of all  
477 strains, show increased deuteration in partially deamidated GII.4 P dimers. As we have a mixture  
478 of wildtype and deamidated P domains in the sample, the mass shift we see in the deuterated  
479 spectra reflects the average of all components, unbound and fucose-bound NN, iDN and iDiD  
480 P dimers, which cannot be discriminated. However, binding probability calculations can give a  
481 hint, which species contribute most to the observed increase in deuteration in presence of fucose.



## Glycan-induced protein dynamics in norovirus P dimers

482 Considering the fractions of wildtype and deamidated P domains and their different  $K_d$ s for fucose  
483 binding [19], in GII.4 MI001 only 17 % of binding events occur in pure wildtype NN dimers, 54 %  
484 in half-deamidated iDN dimers and 29 % in fully deamidated iDiD dimers. For GII.4 Saga even  
485 more binding events take place in fully deamidated P dimers (2:31:67 % for NN, iDN; iDiD), clearly  
486 showing that the detected increased deuteration is caused by fucose binding to at least half-  
487 deamidated P dimers. This suggests that fucose binding results in different dynamics in the  
488 wildtype and partially deamidated protein.

489 In GII.4 MI001 regions with bimodal peak distributions (Figure 4D), relative intensities of both  
490 distributions are similar to the ones in the wildtype protein. However, interaction with fucose in the  
491 partially deamidated GII.4 MI001 P dimer does not lead to a significant increase in the relative  
492 intensity of the lower deuterated peak distribution, as seen in the wildtype protein (Figure 4D).

493 Slight bimodality is also present in peptides covering the canonical fucose binding site in the  
494 fucose bound state but relative intensities are similar to the ones observed for the wildtype protein.

495 A comparison of FD normalized deuteration levels for wildtype and deamidated GII.4 MI001  
496 P dimers without glycans reveals increased deuterium incorporation in large parts of the P2  
497 domain, as well as the P1 domain (Figure 4E). Highest deuteration differences ( $\Delta D > 1$  Da) are  
498 detected for residues 335-432 located in the P2  $\beta$ -sheet cleft. This is in line with the increased  
499 flexibility in the P2 domain of the deamidated GII.4 Saga P dimer [19] (Figure 4F), however, in  
500 GII.4 MI001 this effect is propagated into regions more distant from the glycan binding pocket and  
501 deamidation site. The increased dynamics could weaken the dimer interfaces and therefore  
502 explain the dissociation into monomers in the deamidated protein. Additionally, monomers will  
503 most probably also experience higher HDX because of missing dimer interactions in the P1  
504 domain and the P2  $\beta$ -sheets [52] that will add to the observed increase in deuteration compared  
505 to the exclusively dimeric wildtype protein.

506



Glycan-induced protein dynamics in norovirus P dimers

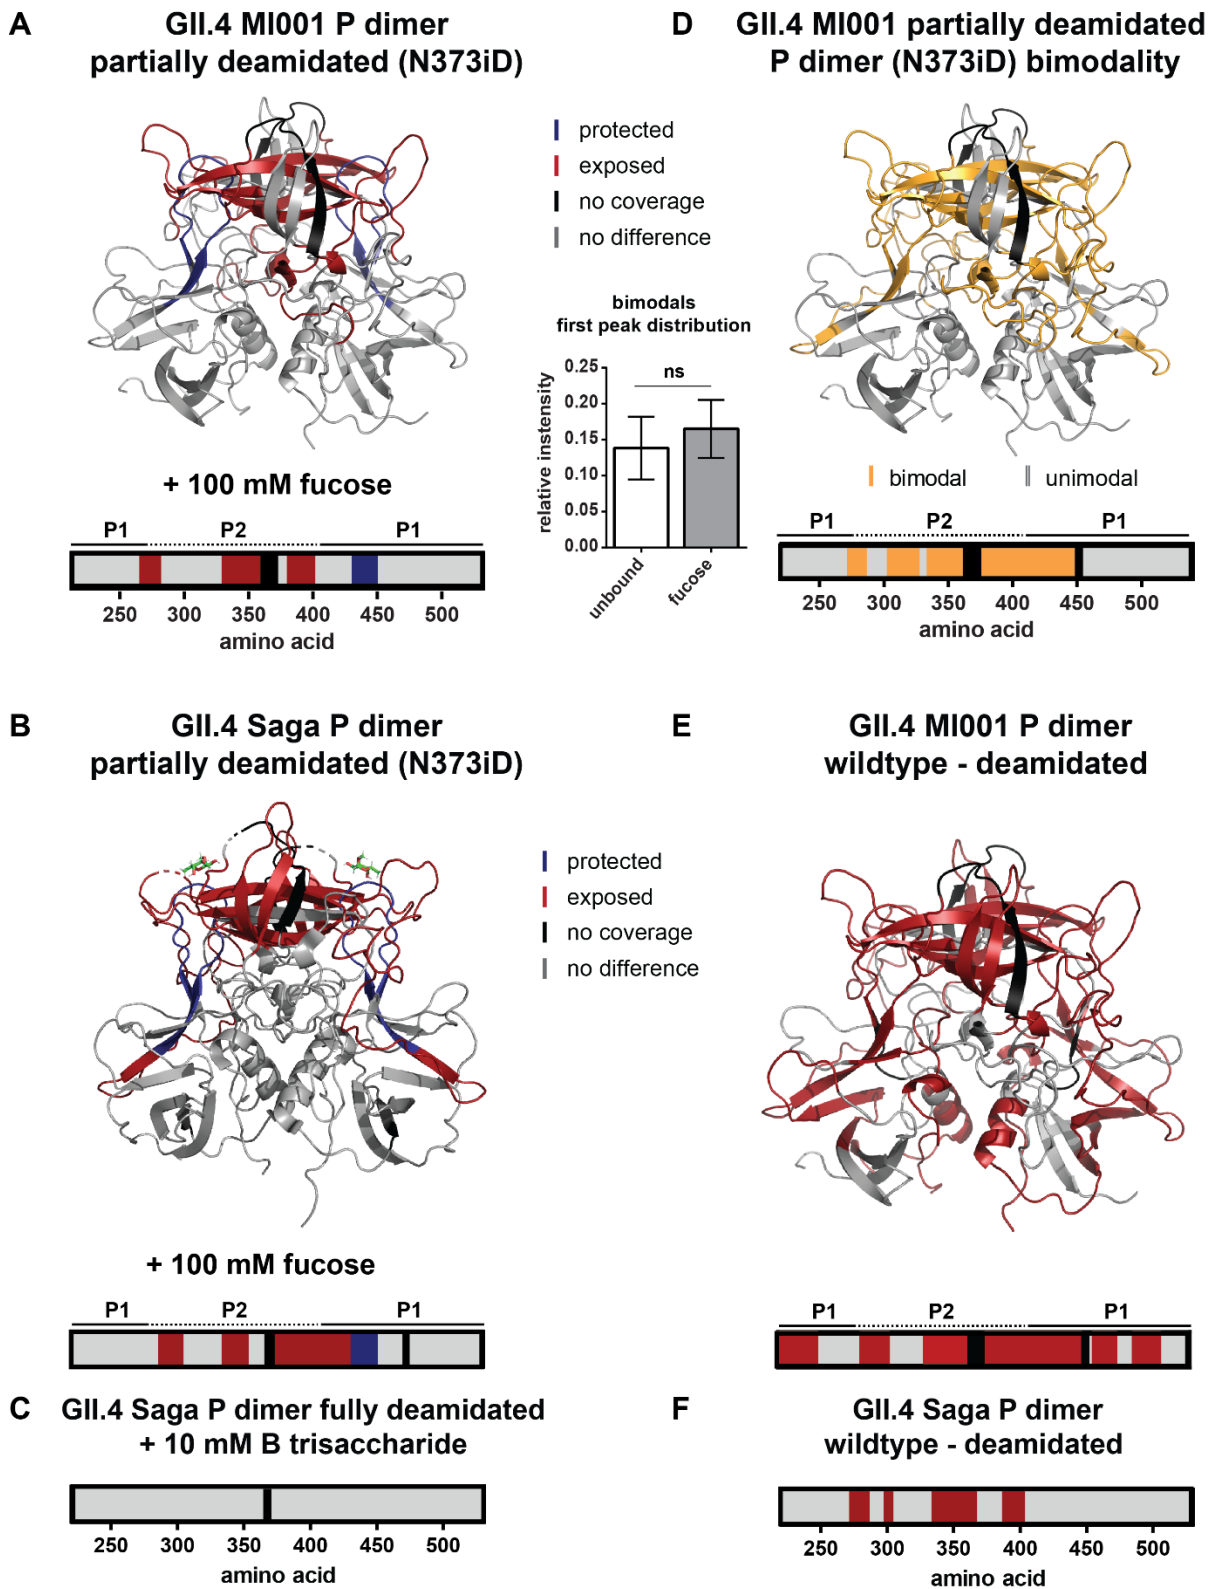

507  
508 Figure 4: Significant HDX differences in partially deamidated (N373iD) GII.4 MI001 P dimers. A/B Fucose  
509 can still bind to the canonical glycan binding site in partially deamidated GII.4 MI001 (A) and GII.4 Saga (B)

## Glycan-induced protein dynamics in norovirus P dimers

510 P dimers (pdb 6H9V). In contrast to the wildtype N373 P dimer, parts of the P2 domain get more exposed  
511 upon interaction with 100 mM fucose. (C) HDX differences in fully deamidated GII.4 Saga P dimers in  
512 presence of 10 mM HBGA B trisaccharide are shown for comparison [19]. (D) Bimodality occurs in similar  
513 regions as for the wildtype P dimer, implying that the more protected population is also present in the partially  
514 deamidated sample. In contrast to the native P dimer, the relative intensity of the first peak distribution does  
515 not significantly increase under fucose treatment (for statistics refer to description of Figure 3). (E) The  
516 partially deamidated GII.4 MI001 N373iD P dimer shows a higher deuterium uptake in large parts of the  
517 structure, which points towards higher flexibility, like in the fully deamidated GII.4 Saga P dimer [19] (F).

## 518 MD simulations

519 MD simulations were utilized to further investigate the norovirus P dimer strains. The RMSD  
520 relative to the starting structure post-equilibration were calculated in order to estimate protein  
521 dynamics during MD simulations. RMSF calculations were employed to examine fluctuations  
522 throughout the simulated time frame, and highlight alterations in flexible regions of the different  
523 protein chains. As support for the RMSF data, we calculated the  $A_{sas}$  of the P dimers during the  
524 simulation with respect to their crystal structure, providing an understanding of an increase or  
525 decrease of the surface area of each individual residue.

526 The RMSD for the four norovirus P dimer strains are reported in Figure S18, in which the simulated  
527 GII.4 Saga and MI001 P dimers reached a value of 1.5 Å after 100 ns. GII.10 Vietnam P dimers  
528 show a maximum deviation around 90 ns at 2 Å, decreasing to 1.8 Å after 100 ns. GII.17 Kawasaki  
529 P dimers demonstrate a still slightly increasing trend at the end of the simulation, indicating that  
530 this system has not yet fully adapted to the solution environment. The RMSFs and  $A_{sas}$  relative to  
531 the respective crystal structures reveal differences in protein chain flexibility of the norovirus  
532 strains, as depicted in Figure 5 and S17. The sequences were aligned for a better comparison.  
533 Hence, resulting gaps in the individual RMSF graphs are due to missing residues at that specific  
534 position. Least stability is introduced for the GII.4 Saga strain, as the RMSF values suggest only  
535 a limited increase in fluctuation during the 100 ns of simulation. GII.4 MI001 and GII.17 Kawasaki

## Glycan-induced protein dynamics in norovirus P dimers

536 follow a similar trend. In contrast, GII.10 Vietnam P dimers show overall higher flexibility compared  
537 to the other strains, in particular a peak around residue 350 in the P2 domain. Similar trends can  
538 be observed for the  $A_{sas}$  graphs depicted in Figure S17. GII.10 Vietnam demonstrates the highest  
539 area values, which support the peaks observed in the RMSF graph in Figure 5A. The various P  
540 dimer structures were overlaid in the PyMOL software, where areas of interest were imaged in  
541 order to further explore differences of the protein crystal structures (Figure S19).

542 Investigating GII.4 Saga P dimers complexed by fucose, and the potential role of deamidation, the  
543 data revealed minimal difference between the RMSD values of said systems. RMSDs for the NN,  
544 iDN and iDiD G.II 4 Saga dimers show a similar trend, reaching a value between 1.6 and 1.75 Å  
545 after 100 ns of simulation (Figure S20). RMSF and  $A_{sas}$  calculations to investigate the role of  
546 deamidation in the GII.4 Saga strains show that the individual graphs follow a similar trend,  
547 suggesting only limited influence of the deamidation on the overall P dimer structure (Figure S21-  
548 23) which is in line with previous crystallography data [19].

549

## Glycan-induced protein dynamics in norovirus P dimers

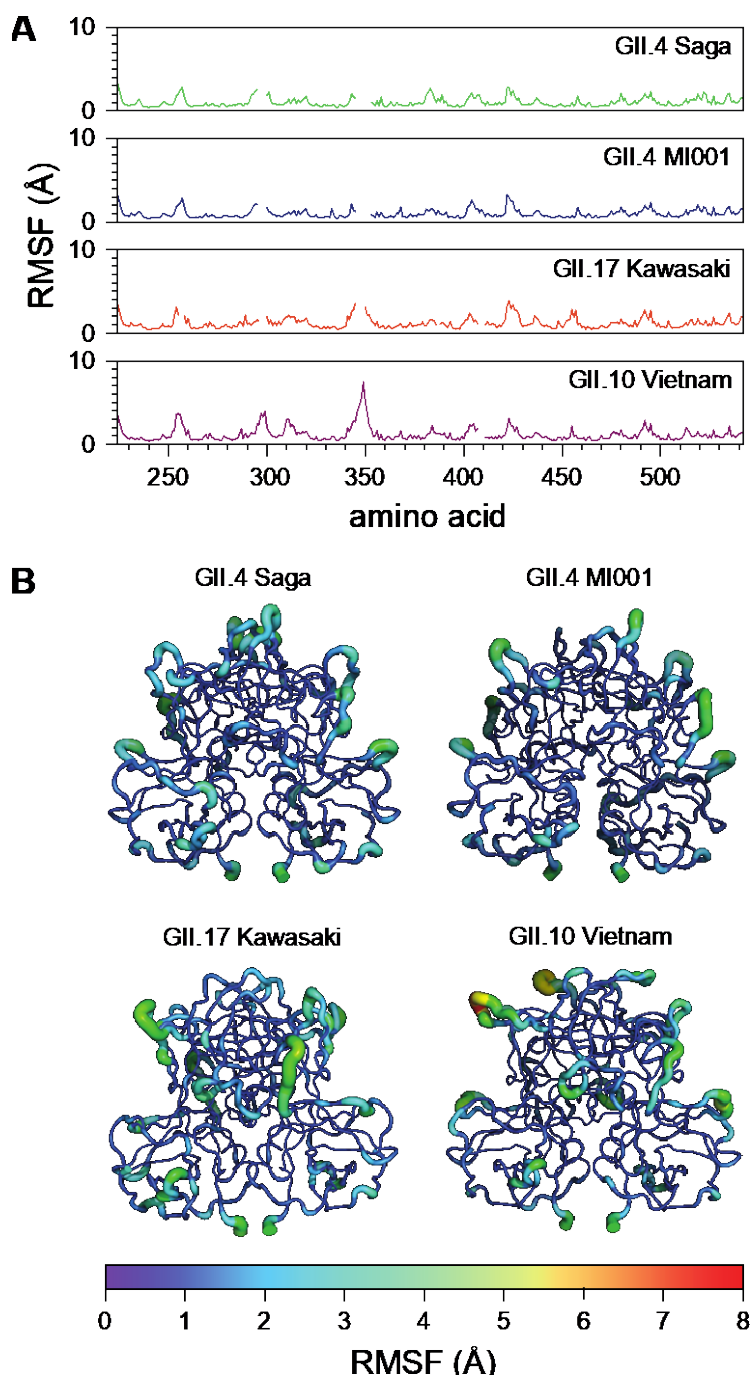

550  
551 Figure 5: Difference in fluctuations between the P dimer strains propose increased flexibility in the protein  
552 chains in absence of a ligand. A) RMSF data of GII.4 Saga, GII.4 MI001, GII.17 Kawasaki and GII.10  
553 Vietnam, simulated for a total of 1  $\mu$ s each, reveal different protein chain dynamics between the strains, with  
554 most prominent peak around residue 350. Gaps in the data originate from alignment of the norovirus P dimer  
555 sequences. B) RMSF values of GII.4 Saga, GII.4 MI001, GII.17 Kawasaki and GII.10 Vietnam visualized in  
556 the structures, highlighting residues with increased fluctuations during the simulations.

## Glycan-induced protein dynamics in norovirus P dimers

### 557 Discussion

558 In this study, we address the differences in structural responses to glycan binding of norovirus P  
559 dimers of the Asian epidemic strain GII.17 Kawasaki 308, the rarely detected strain GII.10 Vietnam  
560 026 and the GII.4 MI001 strain, which belongs to the highly pandemic GII.4 genotype and has  
561 been shown to infect mice as well [21].

### 562 **Bimodal peak distributions could originate from P particle formation**

563 In our glycan-binding data, we observe the presence of bimodal peak distributions in a large  
564 variety of peptides located in the P2 domain and the lower part of the P1 domain in all strains but  
565 the previously analyzed GII.4 Saga. The intensity of the lower deuterated peak distribution was  
566 between 7% and 17 % and relative intensities of both distributions remained constant over time.  
567 This observation points towards two distinct protein populations [26] that experience a different  
568 level of HDX over the whole exchange period. The low deuteration of the first peak distribution  
569 suggests the presence of a compact conformation that is shielded from HDX. This could be in  
570 principle true for protein aggregates, however, a protection of only the top and bottom part of the  
571 protein appears very distinct. In case of protein aggregation, we would expect bimodality all over  
572 the protein surface.

573 So, if the lowly deuterated population is no artifact, what could it be instead? The P domain can  
574 form larger oligomers of different stoichiometry, up to whole 24-mer P particles, depending on the  
575 protein concentration [53, 54]. P oligomers form contacts through interactions in the lower part of  
576 the P1 domain of each P dimer [53], which could explain the reduced deuteration in this area.  
577 Closer inspection of the cryo EM structure [53] also suggests more contacts between the P2  
578 domains compared to free P dimer. Importantly, the absence of bimodality in GII.4 Saga P dimers  
579 implies that this strain has a different ability to form P oligomers than the closely related GII.4  
580 MI001 strain.

## Glycan-induced protein dynamics in norovirus P dimers

581 P particles can bind HBGAs and are even suspected to interact with them in the same way as  
582 VLPs [53, 55]. However, in the presence of glycans no significant deuteration difference could be  
583 detected in low deuterated peak distributions. Nevertheless, this does not explicitly mean that  
584 there is no binding in these areas. Interpretation of no significant deuteration difference on a  
585 certain time scale as the absence of any structural change should be treated with caution for  
586 several reasons [28]. First, the intensity and thus the signal-to-noise ratio in the lower deuterated  
587 peak distribution is low, which makes it difficult to detect statistically significant changes in  
588 deuteration. Secondly, HDX is reduced in the lower deuterated population compared to P dimers  
589 and would therefore need longer exchange times to reflect potential differences. In addition, peak  
590 distributions in peptides covering the canonical glycan binding site are unimodal and show  
591 protection in all strains, meaning this interaction can be found in the entire protein population.  
592 In our data there is a clear increase of the potential P particle population in presence of 100 mM  
593 fucose, which could mean that interaction with glycans supports the formation of P particles that  
594 is otherwise less pronounced [55]. It has to be noted that we did not observe P particle oligomers  
595 in native MS of a 4.5  $\mu$ M P dimer solution and our protein constructs lack the C-terminal arginine  
596 cluster that has been shown to be important for P particle formation [56, 57]. However, the < 20%  
597 of monomers, assumingly assembled into 24-mer P particles in absence of glycans, would amount  
598 to around 1% of total signal intensity split up into many charge states in native MS, which likely  
599 drop below detection limit. In contrast, fractions of structural variants of less than 5 % can be  
600 detected in a properly conducted HDX-MS experiment [58].

601

## Glycan-induced protein dynamics in norovirus P dimers

### 602 **Glycan binding in different strains**

603 Apart from the presence of two distinct protein species in the sample, we could also detect  
604 differences in glycan-induced protein dynamics in different strains. For GII.4 MI001, protected  
605 regions were almost identical to the earlier investigated GII.4 Saga P dimer (canonical binding site  
606 G443, Y444 and residues 283-303) [19], apart from additional protection in the upper P2 binding  
607 cleft (residues 333-353). Involvement of this region has been seen in NMR data of GII.4 Saga P  
608 dimers as well [19]. Furthermore, a recent NMR study suggests identical glycan binding behavior  
609 of both GII.4 strains [49]. The same study also shows that MNV P dimers do not bind HBGAs,  
610 underscoring that infectivity of GII.4 MI001 in mice cannot be explained by different glycan-induced  
611 dynamics between GII.4 Saga and MI001 in line with our observations.

612 GII.17 Kawasaki P dimer crystal structures with fucose and HBGA A trisaccharide show backbone  
613 interactions in T348 and G443 and side chain interactions in R349, D378 and Y444 [11, 59]. When  
614 incubated with HBGA B trisaccharide and fucose, protection from HDX is observed for residues  
615 333-353 corresponding to interactions with T348 and R349. In the presence of 100 mM fucose,  
616 the canonical binding site (G443, Y444) is protected, as well as residues 269-286, which cannot  
617 be explained by the known interactions from the crystal structures. This region is located below  
618 the glycan binding cleft in the protein center, so protection from HDX could rather be the result of  
619 a long-distance structural change than of direct interaction with fucose. It would be interesting to  
620 see how long-distance structural changes would further propagate into the S domain in VLPs and  
621 if they would influence the dynamic P domain lift off from the S domain that has been seen for  
622 different norovirus strains [60-62].

623 For the GII.10 Vietnam strain, binding of two HBGA B trisaccharide molecules and up to four  
624 fucose molecules has been seen in crystal structures [10, 12]. Compared to GII.4 MI001 and  
625 GII.17 Kawasaki, we see protection in more protein areas for both HBGA B trisaccharide and  
626 fucose, which mainly corresponds to the known glycan interactions summarized in Table 1. Due



## Glycan-induced protein dynamics in norovirus P dimers

627 to close proximity of interacting amino acids in fucose binding sites 1/2 and 3/4 we cannot  
628 distinguish these binding sites in HDX data at peptide resolution, but occupation of all four binding  
629 sites is likely at the given concentration [12]. Interestingly, we see a protection of several residue  
630 stretches that cannot be explained by known glycan interactions. Residues 285-298 are protected  
631 in presence of fucose, similar to GII.4 strains. Residues 311-336 belong to an unstructured region  
632 below the P2 binding cleft and could link the protection observed in the cleft to the one in residues  
633 285-298. In presence of HBGA B trisaccharide, protection of the aforementioned residues is not  
634 present under the chosen conditions. A possible explanation could be that these changes in  
635 dynamics are triggered by occupation of binding sites 3 and 4 in the P2 cleft, which so far has not  
636 been seen for HBGA B trisaccharide at similar concentrations [12]. HBGA B trisaccharide binding  
637 is mainly mediated by the fucose residue, with an additional interaction of galactose with G451  
638 and some water mediated interactions [10]. In our data we detect protection of residues 483-496  
639 on the bottom of the P dimer in addition, which could be a long-range effect not triggered by fucose  
640 alone.

641  
642 Table 1 Comparison of protected residues in HDX with known glycan interactions in crystal structures.  
643 Binding sites 1/2 are conserved for many strains and glycans, binding sites 3/4 have so far only been  
644 detected in GII.10 Vietnam. For GII.17 Kawasaki only crystal structures with fucose and A trisaccharide are  
645 available, so protected residues for B trisaccharide are compared to binding sites seen for A trisaccharide.  
646 P dimer chain annotations are given for fucose binding sites 1 and 3. No crystal structure is available for  
647 GII.4 MI001 P dimers, so binding sites are marked as unknown (NA). Protected residues for wildtype GII.4  
648 Saga P dimers [19] are shown for comparison.

| <b>Protected residues in HDX</b>           | <b>Fucose binding site 1/2</b> | <b>Fucose binding site 3/4</b> |
|--------------------------------------------|--------------------------------|--------------------------------|
| <b>GII.10 Vietnam + 100 mM fucose [12]</b> |                                |                                |
| <b>285-298</b>                             | -                              | -                              |



Glycan-induced protein dynamics in norovirus P dimers

|                                                          |                                  |                |
|----------------------------------------------------------|----------------------------------|----------------|
| <b>311-336</b>                                           | -                                | -              |
| <b>337-364</b>                                           | N355 (chain A)<br>R356 (chain A) | E359 (chain A) |
| <b>379-399</b>                                           | D385 (chain A)                   | W381 (chain A) |
| <b>442-458</b>                                           | G451 (chain B)<br>Y452 (chain B) | L449 (chain A) |
| <b>GII.10 Vietnam + 10 mM HBGA B trisaccharide [10]</b>  |                                  |                |
| <b>336-361</b>                                           | N355 (chain A)<br>R356 (chain A) | -              |
| <b>379-428</b>                                           | D385 (chain A)                   | -              |
| <b>440-458</b>                                           | G451 (chain B)<br>Y452 (chain B) | -              |
| <b>483-496</b>                                           | -                                | -              |
| <b>GII.17 Kawasaki + 100 mM fucose [11, 59]</b>          |                                  |                |
| <b>269-286</b>                                           | -                                | -              |
| <b>333-353</b>                                           | T348 (chain A)<br>R349 (chain A) | -              |
| <b>434-452</b>                                           | G443 (chain B)<br>Y444 (chain B) | -              |
| -                                                        | D378 (chain A)                   | -              |
| <b>GII.17 Kawasaki + 10 mM HBGA B trisaccharide [11]</b> |                                  |                |
| <b>333-353</b>                                           | T348 (chain A)<br>R349 (chain A) | -              |
| -                                                        | G443 (chain B)<br>Y444 (chain B) | -              |
| <b>GII.4 MI001 + 100 mM fucose</b>                       |                                  |                |
| <b>283-303</b>                                           | NA                               | NA             |
| <b>434-449</b>                                           | NA                               | NA             |

## Glycan-induced protein dynamics in norovirus P dimers

| <b>GII.4 MI001 + 10 mM HBGA B trisaccharide</b>         |                |    |
|---------------------------------------------------------|----------------|----|
| <b>283-298</b>                                          | NA             | NA |
| <b>333-353</b>                                          | NA             | NA |
| <b>434-450</b>                                          | NA             | NA |
| <b>GII.4 Saga + 100 mM fucose</b>                       |                |    |
| <b>GII.4 Saga + 10 mM HBGA B trisaccharide [18, 19]</b> |                |    |
| <b>283-303</b>                                          | -              | -  |
| <b>no coverage</b>                                      | D374 (chain A) |    |
| <b>434-449</b>                                          | G443 (chain B) |    |
|                                                         | Y444 (chain B) | -  |

649

650 Taken together, P dimers of all investigated strains showed protection of the upper P2 binding  
651 cleft (residues 333-353) underscoring the importance of this region for glycan binding. Protection  
652 of the canonical glycan binding site (G443, Y444 for GII.4 and GII.17; G451, Y452 for GII.10) was  
653 also detected in all strains and for all glycans apart from HBGA B trisaccharide binding with GII.17  
654 Kawasaki P dimers. HBGA B trisaccharide could have a lower binding affinity in GII.17 Kawasaki  
655 compared to the other strains that leads to smaller deuteration changes that are below the  
656 detection limit in the current experimental setup. We also noticed that the GII.17 Kawasaki  
657 datasets have a higher back exchange (D/H) than the other datasets so that small glycan induced  
658 deuteration changes are more likely to be lost during the measurement. GII.4 and GII.10 P dimers  
659 show protection of residues 285-298, which is also absent in GII.17 P dimers. Interestingly, P  
660 dimers of the more prevalent strains GII.4 and GII.17 [3, 4] show less changes in HDX upon glycan  
661 binding compared to GII.10 Vietnam, which is rarely detected in patients [10].

662 The RMSD plots for the four investigated P dimer strains without ligand reveal minimal differences  
663 between all systems (Figure S22). Whilst GII.4 Saga and MI001 trends reach a plateau, one can  
664 observe a still increasing trend GII.17 Kawasaki. This indicates that this system has not yet  
665 reached a stable conformation. The GII.10 Vietnam shows a decrease towards the end of the

## Glycan-induced protein dynamics in norovirus P dimers

666 simulation, indicating that this system just adapted to the environment and obtained a stable  
667 structure.

668 For the MD simulations, we were interested in the dynamics in absence of fucose, and we  
669 observed an increase in flexibility throughout the peptide chain, accompanied with changes of the  
670  $A_{sas}$ , which we present in Figure 5. The most prominent difference between the strains is a high  
671 peak around the glycan binding site near residue 350 exclusively in GII.10 Vietnam P dimers.  
672 GII.10 Vietnam has a longer loop around residue 350, which could explain the higher flexibility in  
673 absence of fucose (Figure 5). On further investigation however, when complexed by the ligand in  
674 the crystal structure, this loop adopts a short helical structure (Figure 6A), forming a pocket  
675 shielding nearby residues from deuterium exchange, as observed in the HDX-MS experiment  
676 (Figure 3B). The crystal structures of the other strains have more unstructured loops. In our  
677 simulations of ligand-free GII.10 Vietnam P dimers, the loop becomes flexible and unstructured,  
678 as seen by the high RMSF values of up to 7.5 Å, and evident from snapshots taken from the MD  
679 trajectory (Figure 6B), which would explain the protection provided by bound ligands. This is  
680 further supported by the increase of area accessible by the solvent (Figure 5B). As such, for GII.10  
681 Vietnam, the binding of fucose or other ligands promotes a structural rearrangement of the glycan  
682 binding site near residue 350 (Figure 6A) not seen in the other strains.

683 Around residue 250 and 300 the GII.10 Vietnam strain presents increased flexibility compared to  
684 GII.4 Saga, GII.4 MI001 and GII.17 Kawasaki. Near residue 424, a smaller peak can be observed  
685 for all four strains (Figure 5). This could be a result of the individual chain orientations, and the  
686 different sequence alignment one can find in these areas (Figure S19A-C). The residues that are  
687 part of this area of interest seem to form smaller loops on the surface of the protein, which is likely  
688 the reason of the recorded high flexibility.

689

## Glycan-induced protein dynamics in norovirus P dimers

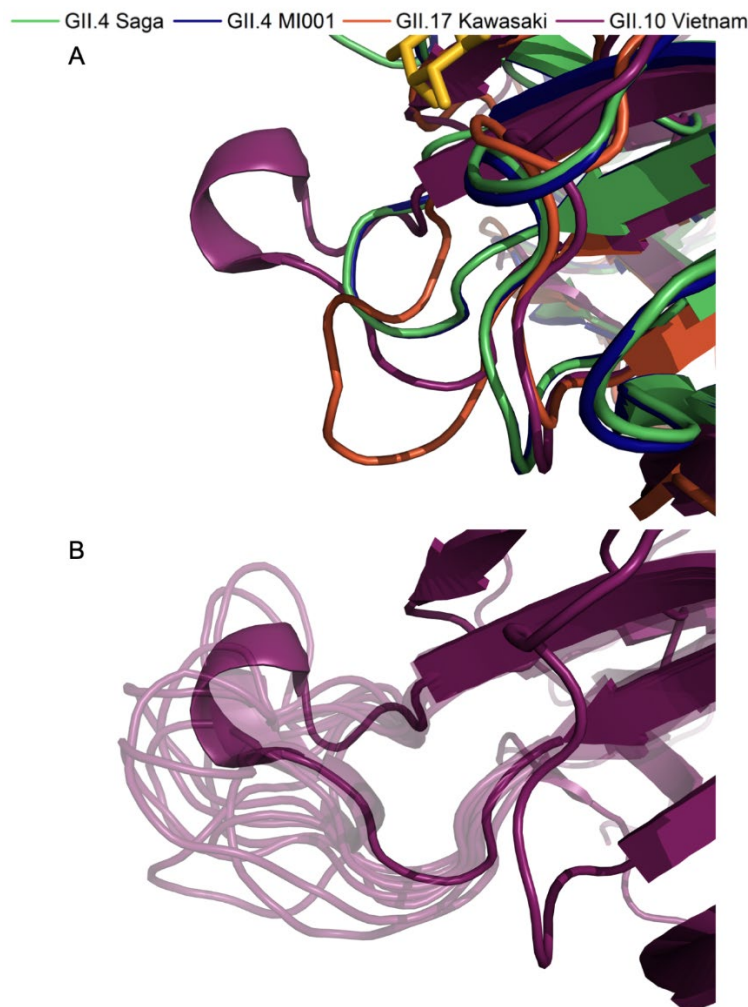

690  
691 Figure 5: Structural rearrangement of the glycan binding site in absence of fucose. A) Zoomed in image of  
692 the overlaid P domain structures around residue 350, complexed with fucose. The presence of fucose  
693 stabilizes a small helix, forming an ordered pocket in the GII.10 Vietnam strain (purple). B) Absence of  
694 fucose results in a high flexibility of the GII.10 Vietnam pocket and a loss of the short helix, as shown in the  
695 snapshots of different conformations throughout the simulation (light purple). These snapshots were taken  
696 from every 10<sup>th</sup> frame of a single trajectory.

### 697 **The role of N373 deamidation**

698 For GII.4 Saga P dimers it was observed earlier that spontaneous transformation of N373 into iso-  
699 aspartate (iD) attenuates glycan binding in fully deamidated iDiD P dimers. Deamidation is site-  
700 specific and happens over a timescale of 1-2 days at pH 7.3 and 37°C correlating with the length

## Glycan-induced protein dynamics in norovirus P dimers

701 of the infection cycle [19]. The high specificity of this deamidation under infection conditions  
702 suggested that this process could occur as well *in vivo*, however, the biological relevance for  
703 infection remained unclear.

704 To test if this effect can also be found in the closely related GII.4 MI001 strain, we performed HDX-  
705 MS on a spontaneously deamidated P dimer sample, resulting in mixed populations of NN, iDN  
706 and iDiD dimers, which is more likely to be found in a natural infection context. For comparison,  
707 we also measured fucose binding to a partially deamidated GII.4 Saga P dimer, which contained  
708 an even higher fraction of fully deamidated iDiD P dimers. Strikingly, protection of the canonical  
709 glycan binding site could still be detected in both isolates under fucose treatment, mainly  
710 corresponding to binding to iDN and iDiD P dimers. Additionally, the P2 cleft was more exposed  
711 in the partially deamidated sample under fucose treatment, in contrast to the protection observed  
712 in the wildtype NN P dimer. This indicates that under natural deamidation conditions, glycan  
713 binding at the canonical binding site still happens, but induces different dynamics than in the purely  
714 wildtype P dimer. The exposure of the P2 cleft suggests that after glycan binding this area gets  
715 more flexible, which could be required to interact with other factors or the until now unknown  
716 receptor. As such an increase in deuteration is not present in wildtype NN P dimers, this effect  
717 must be caused either by direct binding to deamidated P domains in iDN or iDiD dimers or by  
718 binding to wildtype P domains in iDN dimers, whose overall dynamics are altered by the influence  
719 of the neighboring deamidated monomer. RMSD, RMSF and  $A_{sas}$  calculation for the GII.4 NN, iDN  
720 and iDiD Saga P dimers show no striking differences when compared to each other and follow a  
721 similar trend (Figure S20-23). The fact that our MD simulations were unable to detect differences  
722 between deamidated and non-deamidated P dimers suggests that any differences in dynamics  
723 are manifested on timescales longer than a few 100 ns. Neither protection of binding sites nor  
724 increased deuteration in P2 has been seen in previous HDX-MS measurements of fully  
725 deamidated GII.4 Saga P dimer with 10 mM HBGA B trisaccharide under nearly identical  
726 conditions [19]. A possible explanation could be that HBGA B trisaccharide concentration was too

## Glycan-induced protein dynamics in norovirus P dimers

727 low to induce the observed effects because of decreased binding affinity. Notably, NMR  
728 measurements of fully deamidated GII.4 Saga P dimers with HBGA B trisaccharide and fucose  
729 show large chemical shift perturbations around residues 370-380 [19], a region where we observe  
730 increased deuteration in presence of fucose.

731 We hypothesize that N373 deamidation serves as a pH and temperature dependent mechanism  
732 to control infectivity of the virus. P dimers and VLPs have been shown to be stable under low pH  
733 conditions and temperature [63], where deamidation rate is low [19]. After entering the human  
734 host via contaminated food and reaching the intestine, the rise in pH and temperature facilitates  
735 conversion of pure wildtype to partially deamidated P dimers that are still able to attach to glycans  
736 and perform the structural change potentially required for interaction with the receptor and  
737 infection of the target cell. This theory is supported by the observation of increased flexibility in the  
738 P2 cleft of iDiD GII.4 Saga P dimers compared to the wildtype [19], which is also present in GII.4  
739 MI001 P dimers. In summary, this could mean that deamidation creates the required flexibility for  
740 host cell attachment and subsequent receptor binding. Attenuation of glycan binding in the  
741 deamidated P dimer could be counteracted by avidity due to high glycan presentation on cell  
742 surfaces *in vivo*. Native MS measurements of deamidated GII.4 Saga and MI001 P dimers also  
743 show that with increasing deamidation, dissociation into monomers occurs, whereas in NN P  
744 dimers no monomers are present (Figure S10). This could as well be linked to the increased  
745 flexibility of iDiD P dimers that weaken the dimer interface and shift the monomer-dimer  
746 equilibrium. It would be interesting to investigate whether increased flexibility is limited to the P  
747 domain or whether it is propagated into the S domain in VLPs as well, which as a result could  
748 destabilize the particle and prepare for uncoating.

749 The question remains, which advantage the evolutionary conserved N373 deamidation site  
750 provides for the most prevalent GII.4 strains over other strains. One possibility is that higher  
751 flexibility induced by deamidation indeed enables better interactions with host receptors; another  
752 possibility is that it is part of an immune escape mechanism. N373 is located in the

## Glycan-induced protein dynamics in norovirus P dimers

753 immunodominant antibody epitope A and even minor changes in the epitope sequence during  
754 viral evolution have resulted in the loss of monoclonal antibody response [64]. From all residues  
755 in this specific epitope, N373 seems to be highly conserved over time.

756 On the other hand, prevalence of GII.17 strains increased over the last years [4], and based on its  
757 D377 sequence the GII.17 Kawasaki P dimer is not able to deamidate at this position. Interestingly,  
758 a N373D mutated GII.4 Saga P dimer shows similar affinities to glycans as the N373 wildtype [49]  
759 clearly illustrating that iso-aspartate is required at this position to induce the observed changes.  
760 The absence of iso-aspartate formation resulting from spontaneous deamidation could also  
761 increase stability under a wide range of pH conditions, as dissociation into monomers is less likely  
762 to occur. Increased stability under alkaline conditions has been seen for GII.17 Kawasaki VLPs,  
763 however, other strains without potential deamidation sites were less stable at alkaline pH [65, 66].

764 GII.10 Vietnam carries a glutamine at the equivalent position 384, which in theory can deamidate  
765 but deamidation is much slower and has not been observed after one year and four months of  
766 storage at 5°C and pH 7 [19]. Nevertheless, GII.10 Vietnam clearly displays gain of structure upon  
767 glycan binding, which may cause the observed long-range effects. The larger structural dynamics  
768 could therefore be linked to cellular uptake.

769 Further research is required to clarify the role of N373 deamidation in the norovirus infection  
770 process. Therefore, research focus should be shifted from wildtype P dimers alone to the more  
771 likely occurring mixture of wildtype and partially deamidated P dimers to elucidate the potentially  
772 important role of deamidation in the infection process. Furthermore, glycan binding studies with  
773 wildtype and partially deamidated VLPs will give further information about the propagation of  
774 structural changes throughout the capsid.

775

## Glycan-induced protein dynamics in norovirus P dimers

### 776 Acknowledgements

777 J.D. and C.U. would like to thank Prof. H. Schlüter (UKE, University of Hamburg, Germany) for  
778 access to high resolution mass spectrometers and Dr. Daniel Kavan, Dr. Petr Man and Dr. Alan  
779 Kádek for providing the DeutEx software. J.D. and C.U. acknowledge funding from FOR2327  
780 ViroCarb. C.U. acknowledges funding from the Leibniz Association through SAW-2014-HPI-4  
781 grant. The Heinrich-Pette-Institute, Leibniz Institute for Experimental Virology is supported by the  
782 Free and Hanseatic City of Hamburg and the Federal Ministry of Health. We thank Dr. Grant  
783 Hansman (University of Heidelberg, Germany) for providing us with the plasmids of the P domains  
784 of GII.4 Saga, GII.10 Vietnam 026 and GII.17 Kawasaki 308. Prof. Dr. Stefan Taube (University  
785 of Lübeck, Germany) is thanked for providing the plasmid of the P domain of GII.4 MI001.  
786 Computational resources were supplied through the Swedish National Infrastructure for  
787 Computing (SNIC) through the Uppsala Multidisciplinary Center for Advanced Computational  
788 Science (UPPMAX) and the High Performance Computing Center North (HPC2N) under project  
789 SNIC 2019/4-554 and 2020/5-100. C.C. acknowledges the Helmholtz Association through the  
790 CFEL at DESY and the Swedish Research Council. This work was supported by MS SPIDOC  
791 within the European Union's Horizon 2020 research and innovation program under grant  
792 agreement No. 801406.

793



## Glycan-induced protein dynamics in norovirus P dimers

### 794 References

- 795 1. Ahmed, S.M., et al., *Global prevalence of norovirus in cases of gastroenteritis: a systematic review*  
796 *and meta-analysis*. The Lancet infectious diseases, 2014. **14**(8): p. 725-730.
- 797 2. Chhabra, P., et al., *Updated classification of norovirus genogroups and genotypes*. J Gen Virol,  
798 2019. **100**(10): p. 1393-1406.
- 799 3. Chan, M.C.W., et al., *Global Spread of Norovirus GII.17 Kawasaki 308, 2014-2016*. Emerg Infect Dis,  
800 2017. **23**(8): p. 1359-1354.
- 801 4. de Graaf, M., et al., *Emergence of a novel GII.17 norovirus - End of the GII.4 era?* Eurosurveillance,  
802 2015. **20**(26): p. 8-15.
- 803 5. Xue, L., et al., *The resurgence of the norovirus GII.4 variant associated with sporadic gastroenteritis*  
804 *in the post-GII.17 period in South China, 2015 to 2017*. BMC Infect Dis, 2019. **19**(1): p. 696.
- 805 6. Prasad, B.V., et al., *X-ray crystallographic structure of the Norwalk virus capsid*. Science, 1999.  
806 **286**(5438): p. 287-290.
- 807 7. Cao, S., et al., *Structural Basis for the Recognition of Blood Group Trisaccharides by Norovirus*.  
808 Journal of Virology, 2007. **81**(11): p. 5949-5957.
- 809 8. Taube, S., A. Mallagaray, and T. Peters, *Norovirus, glycans and attachment*. Curr Opin Virol, 2018.  
810 **31**: p. 33-42.
- 811 9. Bucher, K.S., et al., *Fucose-Functionalized Precision Glycomacromolecules Targeting Human*  
812 *Norovirus Capsid Protein*. Biomacromolecules, 2018. **19**(9): p. 3714-3724.
- 813 10. Hansman, G.S., et al., *Crystal structures of GII.10 and GII.12 norovirus protruding domains in*  
814 *complex with histo-blood group antigens reveal details for a potential site of vulnerability*. J Virol,  
815 2011. **85**(13): p. 6687-701.
- 816 11. Koromyslova, A., et al., *Human norovirus inhibition by a human milk oligosaccharide*. Virology,  
817 2017. **508**: p. 81-89.
- 818 12. Koromyslova, A.D., et al., *The sweet quartet: Binding of fucose to the norovirus capsid*. Virology,  
819 2015. **483**: p. 203-8.
- 820 13. Mallagaray, A., et al., *Attachment of Norovirus to Histo Blood Group Antigens: A Cooperative*  
821 *Multistep Process*. Angewandte Chemie-International Edition, 2015. **54**(41): p. 12014-12019.
- 822 14. Mallagaray, A., et al., *Saturation transfer difference nuclear magnetic resonance titrations reveal*  
823 *complex multistep-binding of l-fucose to norovirus particles*. Glycobiology, 2016.
- 824 15. Wegener, H., et al., *Human norovirus GII.4(MI001) P dimer binds fucosylated and sialylated*  
825 *carbohydrates*. Glycobiology, 2017. **27**(11): p. 1027-1037.
- 826 16. Han, L., et al., *Affinities of recombinant norovirus P dimers for human blood group antigens*.  
827 Glycobiology, 2012. **23**(3): p. 276-285.
- 828 17. Han, L., et al., *Quantifying the binding stoichiometry and affinity of histo-blood group antigen*  
829 *oligosaccharides for human noroviruses*. Glycobiology, 2018. **28**(7): p. 488-498.
- 830 18. Singh, B.K., M.M. Leuthold, and G.S. Hansman, *Human noroviruses' fondness for histo-blood group*  
831 *antigens*. J Virol, 2015. **89**(4): p. 2024-40.
- 832 19. Mallagaray, A., et al., *A post-translational modification of human Norovirus capsid protein*  
833 *attenuates glycan binding*. Nat Commun, 2019. **10**(1): p. 1320.
- 834 20. Dülfer, J., et al., *Structural mass spectrometry goes viral in Virus Structure and Function*, F.A. Rey,  
835 Editor. 2019, Elsevier.
- 836 21. Taube, S., et al., *A mouse model for human norovirus*. mBio, 2013. **4**(4).
- 837 22. Tyanova, S., T. Temu, and J. Cox, *The MaxQuant computational platform for mass spectrometry-*  
838 *based shotgun proteomics*. Nat Protoc, 2016. **11**(12): p. 2301-2319.

## Glycan-induced protein dynamics in norovirus P dimers

- 839 23. Hageman, T.S. and D.D. Weis, *Reliable Identification of Significant Differences in Differential*  
840 *Hydrogen Exchange-Mass Spectrometry Measurements Using a Hybrid Significance Testing*  
841 *Approach*. Anal Chem, 2019. **91**(13): p. 8008-8016.
- 842 24. Houde, D., S.A. Berkowitz, and J.R. Engen, *The utility of hydrogen/deuterium exchange mass*  
843 *spectrometry in biopharmaceutical comparability studies*. J Pharm Sci, 2011. **100**(6): p. 2071-86.
- 844 25. Arora, J., et al., *Hydrogen exchange mass spectrometry reveals protein interfaces and distant*  
845 *dynamic coupling effects during the reversible self-association of an IgG1 monoclonal antibody*.  
846 MABs, 2015. **7**(3): p. 525-39.
- 847 26. Guttman, M., et al., *Analysis of overlapped and noisy hydrogen/deuterium exchange mass spectra*.  
848 J Am Soc Mass Spectrom, 2013. **24**(12): p. 1906-12.
- 849 27. Kavan, D. and P. Man, *MSTools—Web based application for visualization and presentation of*  
850 *HXMS data*. International Journal of Mass Spectrometry, 2011. **302**(1): p. 53-58.
- 851 28. Masson, G.R., et al., *Recommendations for performing, interpreting and reporting hydrogen*  
852 *deuterium exchange mass spectrometry (HDX-MS) experiments*. Nat Methods, 2019. **16**(7): p. 595-  
853 602.
- 854 29. Tommaso, P., et al., *T-Coffee: a web server for the multiple sequence alignment of protein and RNA*  
855 *sequences using structural information and homology extension*. Nucleic Acids Research, 2011. **39**:  
856 p. W13-W17.
- 857 30. Waterhouse, A.M., et al., *Jalview Version 2--a multiple sequence alignment editor and analysis*  
858 *workbench*. Bioinformatics, 2009. **25**(9): p. 1189-91.
- 859 31. Waterhouse, A., et al., *SWISS-MODEL: homology modelling of protein structures and complexes*.  
860 Nucleic Acids Res, 2018. **46**(W1): p. W296-W303.
- 861 32. Bertoni, M., et al., *Modeling protein quaternary structure of homo- and hetero-oligomers beyond*  
862 *binary interactions by homology*. Sci Rep, 2017. **7**(1): p. 10480.
- 863 33. Camacho, C., et al., *BLAST+: architecture and applications*. BMC Bioinformatics, 2009. **10**: p. 421.
- 864 34. Remmert, M., et al., *HHblits: lightning-fast iterative protein sequence searching by HMM-HMM*  
865 *alignment*. Nat Methods, 2011. **9**(2): p. 173-5.
- 866 35. Benkert, P., M. Biasini, and T. Schwede, *Toward the estimation of the absolute quality of individual*  
867 *protein structure models*. Bioinformatics, 2011. **27**(3): p. 343-50.
- 868 36. Pettersen, E.F., et al., *UCSF Chimera--a visualization system for exploratory research and analysis*.  
869 J Comput Chem, 2004. **25**(13): p. 1605-12.
- 870 37. Lindahl, E., et al. *GROMACS 2019.1 Manual (Version 2019.1)*. 2019. DOI:  
871 <http://doi.org/10.5281/zenodo.2564761>.
- 872 38. Hornak, V., et al., *Comparison of multiple Amber force fields and development of improved protein*  
873 *backbone parameters*. Proteins, 2006. **65**(3): p. 712-25.
- 874 39. Paissoni, C., et al., *A critical assessment of force field accuracy against NMR data for cyclic peptides*  
875 *containing beta-amino acids*. Phys Chem Chem Phys, 2018. **20**(23): p. 15807-15816.
- 876 40. Larsson, P., R.C. Kneiszl, and E.G. Marklund, *MkVsites: A tool for creating GROMACS virtual sites*  
877 *parameters to increase performance in all-atom molecular dynamics simulations*. J Comput Chem,  
878 2020. **41**(16): p. 1564-1569.
- 879 41. Mahoney, M.W. and W.L. Jorgensen, *A five-site model for liquid water and the reproduction of the*  
880 *density anomaly by rigid, nonpolarizable potential functions*. Journal of Chemical Physics, 2000.  
881 **112**(20): p. 8910-8922.
- 882 42. Bussi, G., D. Donadio, and M. Parrinello, *Canonical sampling through velocity rescaling*. Journal of  
883 Chemical Physics, 2007. **126**(1).
- 884 43. Nose, S. and M.L. Klein, *Constant Pressure Molecular-Dynamics for Molecular-Systems*. Molecular  
885 Physics, 1983. **50**(5): p. 1055-1076.
- 886 44. Parrinello, M. and A. Rahman, *Polymorphic Transitions in Single-Crystals - a New Molecular-*  
887 *Dynamics Method*. Journal of Applied Physics, 1981. **52**(12): p. 7182-7190.

## Glycan-induced protein dynamics in norovirus P dimers

- 888 45. Allen, M. and D. Tildesley, *Computer Simulations of Liquids*. 1987, Oxford, U.K.: Oxford Science  
889 Publications.
- 890 46. Darden, T., D. York, and L. Pedersen, *Particle Mesh Ewald - an N.Log(N) Method for Ewald Sums in*  
891 *Large Systems*. Journal of Chemical Physics, 1993. **98**(12): p. 10089-10092.
- 892 47. Deutsch, E.W., et al., *The ProteomeXchange consortium in 2017: supporting the cultural change in*  
893 *proteomics public data deposition*. Nucleic Acids Res, 2017. **45**(D1): p. D1100-D1106.
- 894 48. Vizcaino, J.A., et al., *2016 update of the PRIDE database and its related tools*. Nucleic Acids Res,  
895 2016. **44**(D1): p. D447-56.
- 896 49. Creutzmacher, R., et al., *NMR experiments shed new light on glycan recognition by human and*  
897 *murine norovirus capsid proteins* submitted.
- 898 50. Hodge, E.A., M.A. Benhaim, and K.K. Lee, *Bridging protein structure, dynamics, and function using*  
899 *hydrogen/deuterium-exchange mass spectrometry*. Protein Sci, 2019.
- 900 51. Fang, J., et al., *False EX1 signatures caused by sample carryover during HX MS analyses*. Int J Mass  
901 Spectrom, 2011. **302**(1-3): p. 19-25.
- 902 52. Chen, M.W., et al., *Chikungunya virus nsP4 RNA-dependent RNA polymerase core domain displays*  
903 *detergent-sensitive primer extension and terminal adenylyltransferase activities*. Antiviral Res,  
904 2017. **143**: p. 38-47.
- 905 53. Tan, M., et al., *Noroviral P particle: structure, function and applications in virus-host interaction*.  
906 Virology, 2008. **382**(1): p. 115-23.
- 907 54. Bereszczak, J.Z., et al., *Structure, stability and dynamics of norovirus P domain derived protein*  
908 *complexes studied by native mass spectrometry*. J Struct Biol, 2012. **177**(2): p. 273-82.
- 909 55. Tan, M. and X. Jiang, *The p domain of norovirus capsid protein forms a subviral particle that binds*  
910 *to histo-blood group antigen receptors*. J Virol, 2005. **79**(22): p. 14017-30.
- 911 56. Tan, M., J. Meller, and X. Jiang, *C-terminal arginine cluster is essential for receptor binding of*  
912 *norovirus capsid protein*. Journal of Virology, 2006. **80**(15): p. 7322-7331.
- 913 57. Tan, M., et al., *Terminal modifications of norovirus P domain resulted in a new type of subviral*  
914 *particles, the small P particles*. Virology, 2011. **410**(2): p. 345-52.
- 915 58. Hageman, T.S. and D.D. Weis, *A Structural Variant Approach for Establishing a Detection Limit in*  
916 *Differential Hydrogen Exchange-Mass Spectrometry Measurements*. Anal Chem, 2019. **91**(13): p.  
917 8017-8024.
- 918 59. Singh, B.K., et al., *Structural Evolution of the Emerging 2014-2015 GII.17 Noroviruses*. J Virol, 2015.  
919 **90**(5): p. 2710-5.
- 920 60. Jung, J., et al., *High-resolution cryo-EM structures of outbreak strain human norovirus shells reveal*  
921 *size variations*. Proc Natl Acad Sci U S A, 2019. **116**(26): p. 12828-12832.
- 922 61. Smith, H.Q. and T.J. Smith, *The Dynamic Capsid Structures of the Noroviruses*. Viruses, 2019. **11**(3).
- 923 62. Tubiana, T., Y. Boulard, and S. Bressanelli, *Dynamics and asymmetry in the dimer of the norovirus*  
924 *major capsid protein*. PLoS One, 2017. **12**(7): p. e0182056.
- 925 63. Pogan, R., J. Dulfer, and C. Uetrecht, *Norovirus assembly and stability*. Curr Opin Virol, 2018. **31**:  
926 p. 59-65.
- 927 64. Mallory, M.L., et al., *GII.4 Human Norovirus: Surveying the Antigenic Landscape*. Viruses, 2019.  
928 **11**(2).
- 929 65. Pogan, R., et al., *Norovirus-like VP1 particles exhibit isolate dependent stability profiles*. J Phys  
930 Condens Matter, 2018. **30**(6): p. 064006.
- 931 66. Shoemaker, G.K., et al., *Norwalk virus assembly and stability monitored by mass spectrometry*. Mol  
932 Cell Proteomics, 2010. **9**(8): p. 1742-51.

933
